## **Diagnostic performance and clinical implications of rapid SARS-CoV-2 antigen testing in Mexico using real-world nationwide COVID-19 registry data**

Omar Yaxmehen Bello-Chavolla MD, PhD<sup>1\*</sup>, Neftali Eduardo Antonio-Villa MD<sup>2\*</sup>, Luisa Fernández-Chirino<sup>3</sup>, Enrique C. Guerra MD<sup>2</sup>, Carlos A. Fermín-Martínez<sup>2</sup>, Alejandro Márquez-Salinas<sup>2</sup>, Arsenio Vargas-Vázquez MD<sup>2</sup> and Jessica Paola Bahena-López MD<sup>2</sup>

<sup>1</sup>División de Investigación, Instituto Nacional de Geriatria. <sup>2</sup>MD/PhD (PECEM), Faculty of Medicine, National Autonomous University of Mexico. <sup>3</sup>Faculty of Chemistry, National Autonomous University of Mexico.

\*These authors contributed equally to this work

**Short title:** SARS-CoV-2 antigen testing in Mexico

### **Corresponding author**

Omar Yaxmehen Bello-Chavolla. Division of Research. Instituto Nacional Geriatria. Anillo Perif. 2767, San Jerónimo Lídice, La Magdalena Contreras, 10200, Mexico City, Mexico. Phone: +52 (55) 5548486885. E-mail: [oyaxbell@yahoo.com.mx](mailto:oyaxbell@yahoo.com.mx)

**CONFLICT OF INTERESTS:** Nothing to disclose.

**FUNDING:** This research received no specific funding

**Word count:** 3,640 words; 3 Figures, 3 Tables.

## **ABSTRACT (250 WORDS)**

**BACKGROUND:** SARS-CoV-2 testing capacity is important to monitor epidemic dynamics. Given difficulties of large-scale RT-PCR implementation, rapid antigen tests (Rapid Ag-T) have been proposed as alternatives in settings such as Mexico.

**OBJECTIVES:** To evaluate diagnostic performance of Rapid Ag-T for SARS-CoV-2 infection and its associated clinical implications compared to RT-PCR testing in Mexico.

**METHODS:** We analyzed data from the COVID-19 registry of the Mexican General Directorate of Epidemiology up to December 31<sup>st</sup>, 2020 (n=3,374,165) and cases with both RT-PCR and Rapid Ag-T (n=18,446). We evaluated diagnostic performance using accuracy measures and assessed time-dependent changes in AUROC. We also explored test discordances as predictors of hospitalization, intubation, severe COVID-19 and mortality.

**RESULTS:** Rapid Ag-T is primarily used in Mexico City. Rapid Ag-T have low sensitivity 37.6% (95%CI 36.6-38.7), high specificity 95.4% (95%CI 95.1-95.8) and acceptable positive 86.1% (95%CI 85.0-86.6) and negative predictive values 67.2% (95%CI 66.2-69.2). Rapid Ag-T has optimal diagnostic performance up to days 7-10 after symptom, and its performance is modified by testing location, comorbidity, and age. RT-PCR(-) / Rapid Ag-T(+) cases had higher risk of adverse COVID-19 outcomes and were older, RT-PCR(+)/ Rapid Ag-T(-) cases had slightly higher risk of adverse outcomes and  $\geq 7$  days from symptom onset. Cases detected with rapid Ag-T were younger, without comorbidities, and milder COVID-19 course.

**CONCLUSIONS:** Rapid Ag-T could be used as an alternative to RT-PCR for large scale SARS-CoV-2 testing in Mexico. Interpretation of Rapid Ag-T results should be done with caution to minimize the risk associated with false negative results.

**Keywords:** SARS-CoV-2; rapid antigen testing; RT-PCR; Mexico; COVID-19

## INTRODUCTION

SARS-CoV-2 testing capacity has been regarded as a fundamental factor to achieve pandemic control around the world<sup>1</sup>. It has been proposed that prompt isolation of possibly contagious individuals identified by testing and contact tracing is one of the most effective measures to reduce community-level transmission of SARS-CoV-2 infection; furthermore, effective reduction of community-level transmission can only be achieved with well-designed, universal, and cost-effective testing strategies<sup>2</sup>. Although reverse transcription polymerase chain reaction tests (RT-PCR) have been the reference for detection of active SARS-CoV-2 infections, its systematic implementation entails significant technical difficulties in limited resource settings<sup>3</sup>. In order to address these methodological issues, the World Health Organization (WHO) proposed that rapid antigen tests (Rapid Ag-T) and other point-of-care tests (POCTs), which have demonstrated to have a high specificity compared to other molecular techniques<sup>4,5</sup>, could be useful alternatives for large-scale epidemiologic monitoring. With the worldwide rise in the use of Rapid Ag-T and POCTs, the presence of false negative results becomes of high epidemiologic importance, as unknown infected persons can be a vector of community transmission in countries where active SARS-CoV-2 infection is ongoing<sup>8</sup>.

In Mexico, local authorities implemented a sentinel system-testing policy focused on tracking severe cases of COVID-19, and to a lesser extent those mild to moderate cases. Nevertheless, it has been reported that the implementation of full contact tracing procedure is only performed in areas where RT-PCR testing facilities are available<sup>9</sup>. Rapid Ag-T have been recently promoted as a dynamic strategy for detection of active SARS-CoV-2 infection in Mexico to address these issues; however, despite being recommended by the WHO and used worldwide, few studies have evaluated their performance using large epidemiological real-world data<sup>6,7</sup>. The increased use for Rapid Ag-T in Mexico demands a comprehensive evaluation for its diagnostic performance when compared to current reference testing techniques. Furthermore, its clinical implications could lead to the identification of subjects at risk for discrepancies of

Rapid Ag-T results to minimize the risk of complications from COVID-19 and streamline prompt medical care. Here, we aim to assess the performance of Rapid Ag-T for diagnosis of SARS-CoV-2 infection and to examine the clinical implications of the discrepancies in its result compared to RT-PCR test using national epidemiological dataset collected during the COVID-19 pandemic in Mexico.

## **METHODS**

### *Data sources*

This is a retrospective analysis of the open COVID-19 registry dataset collected by the General Directorate of Epidemiology of the Mexican Ministry of Health within the National Epidemiological Surveillance System (NESS), which includes daily updated suspected COVID-19 cases<sup>10</sup>. The database holds information on all persons tested for SARS-CoV-2 infection at public facilities in Mexico, as well as in all private healthcare facilities that follow the legal mandate to report COVID-19 cases to health authorities and the public locations for rapid antigen testing approved by the Mexican Ministry of Health. This report adheres to the STARD guidelines for reporting of diagnostic accuracy tests<sup>11</sup>. A full list of available variables is presented in **Supplementary Materials**.

### *Testing strategies for SARS-CoV-2 in Mexico*

Prior to October 28<sup>th</sup>, 2020, suspected cases were tested for SARS-CoV-2 infection using real-time RT-PCR according to the Berlin Protocol<sup>9</sup>. Suspected COVID-19 cases were defined as an individual whom in the last 7 days has presented  $\geq 2$  of the following: cough, fever, or headache, accompanied by either dyspnea, arthralgias, myalgias, sore throat, rhinorrhea, conjunctivitis, or chest pain. Amongst suspected cases, the Ministry of Health established two protocols for case confirmation: 1) SARS-CoV-2 testing is done widespread for suspected COVID-19 cases with severe acute respiratory infection and signs of breathing difficulty or deaths with suspected COVID-19, 2) for all other cases, a sentinel surveillance model is being

utilized, whereby 475 health facilities which comprise a nationally representative sample evaluate ~10% of mild outpatient cases to provide estimates of confirmed mild cases<sup>9,12</sup>.

After October 28<sup>th</sup>, 2020, tests for SARS-CoV-2 infections additionally included those who were detected using one of the three available Rapid Ag-T including STANDARD™Q COVID-19 Ag Test, Panbio™ COVID-19 Ag RAPID Test Device, and Sofia2 SARS Antigen FIA by Quidel Corporation, which are approved by use and evaluated for efficacy by the National Institute for Epidemiological Diagnosis and Reference and the WHO<sup>13</sup>. These Rapid Ag-T are available in healthcare community-level locations for testing access of suspected COVID-19 cases or by epidemiological association with a suspected case and currently used for tracking the epidemic in Mexico City<sup>14</sup>. Confirmed SARS-CoV-2 infection is defined as an individual with a positive Rapid Ag-T or a positive RT-PCR test; all negative Rapid Ag-T with suspected epidemiological association with a confirmed SARS-CoV-2 case or a clinical profile with high suspicion of COVID-19 are eligible for further evaluation with RT-PCR testing within testing facilities<sup>9</sup>.

#### *Definitions of outcomes and predictors*

For cases who had both RT-PCR and rapid antigen test information available, we used the RT-PCR result as a reference test to classify cases as true positive (RT-PCR + / Rapid Ag-T +), true negative (RT-PCR - / Rapid Ag-T -), false positive (RT-PCR - / Rapid Ag-T +) and false negative (RT-PCR + / Rapid Ag-T -). Severe outcomes were defined as a composite of either death, ICU admission or requirement for invasive ventilation; hospital admission, requirement for invasive intubation and lethality were also evaluated as outcomes. Follow-up time was estimated in days from symptom onset until either hospitalization or death, depending on the outcome of interest, or censoring up to last known follow-up, whichever occurred first.

#### *Statistical analysis*

##### *Population-based statistics*

We compared testing rates standardized per 100,000 inhabitants across Mexican municipalities and its trends over time after its implementation in late October comparing testing

rates between Mexico City and the rest of Mexico due to the high density of Rapid Ag-T in the first. We also compared incident cases detected with RT-PCR and Rapid Ag-T in Mexico City compared to the rest of the country. Furthermore, we compared cases who were assessed exclusively with Rapid Ag-T, RT-PCR, or both to identify factors which influence testing in these settings.

#### *Performance of rapid antigen tests compared to RT-PCR*

We evaluated the performance of Rapid Ag-T compared to RT-PCR using complete-case analysis of individuals who had both results available using confusion matrices and areas under the receiving operating characteristic curves (AUROC) with the *caret* and *pROC* R packages. We further estimated sensitivity, specificity, positive and negative predictive values (PPV, NPV, respectively) and positive and negative likelihood ratios (LR+ and LR-, respectively) and its corresponding 95% confidence intervals with DeLong's method with the *OptimalCutpoints* R package. To evaluate the performance of Rapid Ag-T in different settings, we stratified these metrics according to testing location (Mexico City vs. Rest of Mexico), patient status (inpatient vs. outpatient), cases with and without comorbidities, age (>60 vs. ≤60 years) and time from symptom onset to evaluation (>7 vs ≤7 days from onset).

#### *Time-dependent performance of rapid antigen tests*

We evaluated time-varying diagnostic performance of Rapid Ag-T using time-dependent ROC curves with the *timeROC* R package with inverse probability weighting in Cox regression, adjusted for age and sex for 1, 3, 5, 7, 10 and 15 days from symptom onset. We further evaluated the performance of Rapid Ag-T to predict hospitalization, mortality, and intubation, in cases with or without added RT-PCR testing using the same proposed cut-offs.

#### *Predictors of test discordances*

We tested for predictors of Rapid Ag-T and RT-PCR discrepancies using mixed effects logistic regression, considering heterogeneity in epidemic dynamics across Mexico including municipality of residence as a random effect. To dissect predictors of test discrepancy, for false

positive models we included only false positive and true negative cases and for false negative models we included true positive and false negative cases. We adjusted all models for age, sex, time from symptom onset and comorbidities.

### *Clinical implications of Rapid Ag-T*

First, we evaluated predictors for hospitalization, lethality and the composite event of severe outcomes using time-to-event models under the proportional risk assumption with mixed-effects Cox regression incorporating municipality of residence as a random effect within the frailty term to control for geographical heterogeneity. Next, we evaluated the risk associated with true or false positives and false negatives in Rapid Ag-T compared to true negatives using RT-PCR for hospitalization, lethality and severe outcomes using mixed effects Cox regression models, adjusted for covariates. Both for outcome predictors and for the implication of test discordances on intubation rates, we fitted mixed effects logistic regression models adjusted for covariates and considering municipality of residence as a random effect. For Cox models, proportional risk assumptions were verified using Schönfeld residuals and visual inspection of time-varying effects; for logistic regression models, goodness of fit was evaluated using the Hosmer-Lemeshow test and model selection was carried out using minimization of the Bayesian Information Criterion (BIC). All statistical analyses were conducted using R language version 4.0.3 and a p-value <0.05 was considered as the statistical significance threshold.

## **RESULTS**

### *Study population*

Until December 31<sup>st</sup>, 2020 a total of 3,374,165 subjects had been tested for SARS-CoV-2 in Mexico. Amongst them, 3,009,578 had only an RT-PCR test, 340,484 had only a rapid antigen test and 24,103 subjects had both RT-PCR and rapid antigen tests. When comparing characteristics amongst the three previous groups, cases tested using Rapid Ag-T were younger, predominantly female, had lower rates of chronic comorbidities, and fewer cases who presented with features of severe COVID-19 including pneumonia, requirement for ICU

admission, intubation, or death. Notably, cases who undertook Rapid Ag-T had lower median days from symptom onset to clinical assessment (**Table 1**).

Amongst tested cases, a total of 1,369,368 (40.6%) cases had confirmed SARS-CoV-2 infection using either of those tests and 2,004,797 (59.4%) had a negative result. The rate of positivity was lower for Rapid Ag-T compared to RT-PCR. After the implementation of Rapid Ag-T, the rate of testing using this method was the largest in Mexico City, with over 3,849.55 tests per 100,000 habitants, marginally followed by the state of Tabasco with 181.71 Rapid Ag-T per 100,000 habitants. As of December 31<sup>st</sup>, 2020, ~80% of SARS-CoV-2 testing in Mexico City is being carried out using Rapid Ag-T compared with <10% in the rest of Mexico. Overall, amongst 94,029 confirmed SARS-CoV-2 cases using Rapid Ag-T, 74,178 (78.9%) were confirmed in Mexico City (**Figure 1**). A STARD diagram depicting all evaluated cases and a histogram of time from onset to testing is presented in **Supplementary Material**.

#### *Performance of rapid antigen tests compared to RT-PCR*

A total of 24,103 subjects were tested using both RT-PCR and Rapid Ag-T. Amongst them, 3588 had pending tests results and 2069 had inadequate RT-PCR samples. Overall, a total of 18,446 cases had valid RT-PCR and rapid antigen test results (**Supplementary Materials**). These cases had higher rates of chronic comorbidities and COVID-19 complications compared to cases with Rapid Ag-T only, but lower rates compared to RT-PCR only (**Table 1**). Overall, we observed low concordance between both test modalities ( $\kappa=0.356$ , 95%CI 0.344-0.369); when considering RT-PCR as reference test, we identified 2968 true positives, 4917 false negatives, 479 false positives and 10,082 true negatives, yielding an AUROC of 0.666 (95%CI 0.660-0.671). Overall, we identified that rapid antigen tests have a sensitivity of 37.6% (95%CI 36.6-38.7) and a specificity of 95.4% (95%CI 95.1-95.8), with a PPV of 86.1% (95%CI 85.0-86.6), a NPV of 67.2% (95%CI 66.2-69.2), a LR+ of 8.3 (95%CI 7.6-9.1), and a LR- of 0.65 (95%CI 0.64-0.66). Next, we assessed how the Rapid Ag-T performed in different scenarios and identified a lower performance in Mexico City compared to the rest of Mexico, for



outpatients, younger cases without comorbidities and, notably, in cases who had  $\geq 7$  days from symptom onset at evaluation.

#### *Time-dependent variation in Rapid Ag-T performance*

Given the aforementioned observation of time-varying performance according to the time from symptom onset, we used time-dependent ROC curves to model changes in diagnostic performance over time for detection of SARS-CoV-2 infection. We observed that, compared to RT-PCR, Rapid Ag-T had the better AUROC at 7 days and its performance subsequently decreased until reaching the lowest AUROC at 15 days after symptom onset, adjusted for age and sex. Next, we evaluated whether using one test modality provided better predictive capacity for hospitalization, intubation and mortality, which would have relevant clinical implications for test selection. We observed that a positive RT-PCR was best at predicting hospital admission between 7-10 days after symptom onset and mortality at days 10-15, without significant utility for intubation. For Rapid Ag-T, we observed similar trends, with an optimal window for mortality between days 7-10 after symptom onset (**Table 3**).

#### *Clinical characterization of cases with discordant Rapid Ag-T results*

We evaluated predictors of false positive and negative results in Rapid Ag-T for SARS-CoV-2 using RT-PCR as reference test. Cases with false negative results had  $\geq 7$  days from symptom onset, were younger, and predominantly female. Regarding comorbidities, cases with false negative results were less likely to have underlying immunosuppression, obesity and chronic kidney disease. Regarding false positive results, we only observed increasing age as a significant predictor, with a non-significant trend in cases with chronic kidney disease (**Figure 2**). Next, we investigated whether these test discordances were predictive of COVID-19 outcomes. Regarding hospitalization we observed that, compared to true negative results, risk for hospitalization was higher for cases with false positive (HR 1.79, 95%CI 1.43-2.24), false negative (HR 1.16, 95%CI 1.04-1.29) and true positive (HR 1.89, 95%CI 1.69-2.12) Rapid Ag-T results, adjusted for treatment setting, comorbidities, sex and age. Compared to true negative

results, risk of intubation requirement was higher for false positive test results (OR 2.29, 95%CI 1.17-4.49) and lower for false negative results (OR 0.47, 95%CI 0.28-4.49). When assessing the composite of any severe outcome, we observed a higher risk for cases with false (HR 3.06, 95%CI 2.07-4.52), true positive results (HR 3.16, 95%CI 2.54-3.93) and for false negatives (HR 1.27, 95%CI 1.00-1.60). Finally, mortality risk was the highest for cases with true positive results (HR 4.41, 95%CI 3.39-5.74), followed by cases with false positive (HR 2.85, 95%CI 1.74-4.68) and false negative results (HR 1.86, 95%CI 1.41-2.46, **Figure 3**).

#### *Characterization of SARS-CoV-2 positive cases using Rapid Ag-T*

Finally, we compared positive cases detected using RT-PCR and Rapid Ag-T. As expected, positive SARS-CoV-2 cases detected using Rapid Ag-T have a wider spectrum of disease severity with correspondingly lower rates of hospitalization, intubation, mortality and pneumonia. Cases detected using Rapid Ag-T are younger with lower rates of comorbidity and, notably, less median days from symptom onset to evaluation. Amongst cases assessed using Rapid Ag-T, positive SARS-CoV-2 cases had higher risk for hospitalization in older adults, males and subjects with obesity, immunosuppression, CKD, COPD, diabetes or hypertension. For severe COVID-19 and mortality, we identified higher risk in those with CKD, immunosuppression, COPD, hypertension, diabetes, males and older adults (**Supplementary Material**).

## **DISCUSSION**

Here, we performed a real-life large-scale evaluation of Rapid Ag-T for the detection of SARS-CoV-2 at a community-wide level in Mexico. Rapid Ag-T are primarily used in Mexico City for rapid detection of cases to promote self-isolation and prompt initiation of treatment in severe COVID-19 cases. Given the larger availability of Rapid Ag-T, tested cases are younger and have lower rates of comorbidities previously linked to high risk of severe COVID-19, thus leading to lower rates of severe outcomes likely reflective of the true spectrum of SARS-CoV-2 infection in the community<sup>12,15</sup>. We observed that age, comorbidity and time from symptom

onset significantly impact the performance of Rapid Ag-T for SARS-CoV-2 and that optimal performance for these tests decreases after 7-10 days from symptom onset. Furthermore, we identified that positive Rapid Ag-T in cases with negative RT-PCR have higher risks for severe COVID-19 outcomes, indicating potential benefit for the use of Rapid Ag-T in addition to RT-PCR testing; notably, cases with false negative results in Rapid Ag-T have slightly higher risk of severe COVID-19 outcomes, with the main determinant for false negative status being the time from symptom onset to test assessment. Finally, older patients with negative RT-PCR had higher odds of a positive Rapid Ag-T, which might call for implementation of sequential testing using Rapid Ag-T after a negative RT-PCR in older adults with high clinical suspicion. Our results represent the largest evaluation on the usefulness of Rapid Ag-T in a real-world setting as well as on how some common chronic conditions might modify its accuracy in comparison with RT-PCR tests. With the recent but limited availability of vaccines to prevent symptomatic SARS-CoV-2, consistent prevention of community-level transmission remains paramount to reduce contagions and prevent mortality until an ideal vaccination threshold can be achieved<sup>16</sup>. In this setting, widespread, frequent and repeated use of Rapid Ag-T is preferable given the limited implementation of large-scale RT-PCR testing for SARS-CoV-2 in Mexico<sup>4,17</sup>.

The use of POCTs is relevant in pandemic settings, where test results can be used to promote self-isolation, adequate treatment allocation and to further contact tracing to reduce rapid dissemination of SARS-CoV-2<sup>18</sup>. A recent meta-analysis of rapid POCTs for SARS-CoV-2 infection evaluated the use of Rapid Ag-T in different settings, identifying varying values of sensitivity coupled with high specificity, accordingly with our study<sup>19</sup>. The authors concluded that Rapid Ag-T can be used as a triage to allocate RT-PCR testing in limited resource settings, which is compatible with our assessment of the clinical implications of false negatives using Rapid Ag-T to detect SARS-CoV-2 infection<sup>20</sup>. Our results show that Rapid Ag-T yield a low sensitivity but a very high specificity for detection of SARS-CoV-2 when compared to RT-PCR. Despite the low sensitivity, the positive and negative predictive values are high likely due to the

high prevalence of SARS-CoV-2 in the community<sup>19</sup>. This is consistent with reports of a re-analysis of published data of diagnostic accuracy of RT-PCR SARS-CoV-2 testing, which described that the risk of false positives increases when extending testing strategies, with increased in false negatives being attributable to local outbreaks<sup>21</sup>. In our study, Rapid Ag-T in Mexico City had a higher LR+ compared with the rest of the country, with equally high rates of false negative results using rapid antigen testing; notably, this testing modality is being used in this location to track trends of the COVID-19 pandemic. Special caution should be taken when evaluating and communicating negative results of rapid antigen tests for SARS-CoV-2, which if misinterpreted could be misleading and reduce adherence for self-isolation of asymptomatic cases identified via contact tracing<sup>22</sup>.

Prior to the instauration of widespread Rapid Ag-T, the Mexican Ministry of Health selected cases for RT-PCR testing based on a sentinel-surveillance system which identified cases based on the presence of respiratory symptoms, leading to an overrepresentation of severe and critical COVID-19 cases<sup>9</sup>. Our group previously profiled cases with non-respiratory symptoms and asymptomatic SARS-CoV-2 infections in Mexico City; we identified that no single symptom offered a reliable assessment of disease severity at the time of initial evaluation, even in population at high risk of contagion such as healthcare workers, as has been confirmed by a recent meta-analysis<sup>23-25</sup>. Given recent evidence which highlights the potential of pre-symptomatic and asymptomatic SARS-CoV-2 transmission and the usefulness of contact tracing as a complement to social distancing and community mitigation policies, SARS-CoV-2 testing should be extended to cases with recent contact with known COVID-19 cases despite the absence of symptoms<sup>22,26,27</sup>. Unfortunately, POCTs have relevant limitations on its diagnostic performance which may question its widespread use to inform public policy or for clinical decision making. Particularly, Rapid Ag-T require an active and symptomatic infection and sampling must be done no later than 7 days after beginning of symptoms, while RT-PCR can be used to assess asymptomatic cases and requires less amount of sample to

yield a positive result<sup>28</sup>. Our data similarly suggests that the time-varying diagnostic performance of Rapid Ag-T might have similar shortcomings to those observed in RT-PCR testing and which need to be considered when using the result of either method to inform decision-making<sup>29,30</sup>. Future studies should investigate the utility of Rapid Ag-T as triage for RT-PCR use in asymptomatic SARS-CoV-2 infection as well as the ideal time frames to reduce the likelihood of discordant results when implementing sequential testing.

Our study had some strengths and limitations. We are using a large national registry of COVID-19 cases, many of whom were tested using both Rapid Ag-T and RT-PCR in a real-world setting which allowed us to reasonably assess diagnostic performance of Rapid Ag-T to detect SARS-CoV-2 infection. We were also able to assess the clinical impact of discordant results on COVID-19 outcomes as well as predictors which indicate settings where additional testing might be useful to reduce the externalities associated with false negative results. Regarding the limitations to be acknowledged is the potential influence of a spectrum effect, where diagnostic accuracy measures vary according to COVID-19 prevalence and the potential detection bias of only testing most cases once, likely missing infections who were initially categorized as false negative with RT-PCR early in the course of infection<sup>31,32</sup>. Furthermore, the use of the sentinel surveillance system to detect and report COVID-19 cases in Mexico likely skews detection towards more severe cases who may also have longer time from symptom onset to evaluation, increasing time-dependent heterogeneity within estimation of predictive accuracy measures<sup>29</sup>. Finally, the lack of disaggregated symptom data prevents assessment of the influence of various symptom clusters in modifying disease detection with different testing modalities, which remains as an area of opportunity for future research<sup>33</sup>.

In conclusion, Rapid Ag-T could be a useful strategy to extend SARS-CoV-2 screening and track trends of the COVID-19 pandemic in Mexico. Rapid Ag-T have poor sensitivity with high specificity but in a setting of local outbreaks, these tests might have high predictive values and be a helpful complement to contact tracing if properly implemented. Rapid Ag-T should be

performed widely and frequently to increase the usefulness of low-sensitive tests and increase diagnostic accuracy as well as to guide allocation of RT-PCR testing in low-resource settings<sup>4,19,34</sup>. Our results could inform situations when a discordant result of Rapid Ag-T for SARS-CoV-2 could be expected and the associated clinical implication of using test results for policy and clinical decision making. The use of Rapid Ag-T warrants future evaluations regarding the influence of symptom presentation, recent contact with confirmed COVID-19 case and disease severity on test accuracy and its role in detecting asymptomatic infection as a complement to contact tracing.

## **ACKNOWLEDGMENTS**

NEAV, ECG, CAFM, AMS, JPBL and AVV are enrolled at the PECEM program of the Faculty of Medicine at UNAM. JPBL, NEAV and AVV are supported by CONACyT. The authors would like to acknowledge the invaluable work of all of Mexico's healthcare community in managing the COVID-19 epidemic. Its participation in the COVID-19 surveillance program has made this work a reality, we are thankful for your effort.

## **DATA AVAILABILITY**

All data sources and R code are available for reproducibility of results at [https://github.com/oyaxbell/covid\\_antigen\\_mx](https://github.com/oyaxbell/covid_antigen_mx).

## **AUTHOR CONTRIBUTIONS**

Research idea and study design OYBC, NEAV, LFC, ECG, AVV, JPBL, CAFM, AMS; data acquisition: OYBC, NEAV; data analysis/interpretation: OYBC, NEAV, LFC, ECG, AVV, CAFM, AMS, JPBL; statistical analysis: OYBC, NEAV; manuscript drafting: OYBC, NEAV, LFC, ECG, AVV, JPBL, CAFM, AMS; supervision or mentorship: OYBC. Each author contributed important intellectual content during manuscript drafting or revision and accepts accountability for the overall work by ensuring that questions about the accuracy or integrity of any portion of the work are appropriately investigated and resolved.

**FUNDING:** No funding was received.

**CONFLICT OF INTEREST/FINANCIAL DISCLOSURE:** Nothing to disclose.

## REFERENCES

1. Tracking COVID-19: Contact Tracing in the Digital Age. Accessed January 2, 2021. <https://www.who.int/news-room/feature-stories/detail/tracking-covid-19-contact-tracing-in-the-digital-age>
2. Lavezzo E, Franchin E, Ciavarella C, et al. Suppression of a SARS-CoV-2 outbreak in the Italian municipality of Vo'. *Nature*. 2020;584(7821):425-429. doi:10.1038/s41586-020-2488-1
3. Majid F, Omer SB, Khwaja AI. Optimising SARS-CoV-2 pooled testing for low-resource settings. *Lancet Microbe*. 2020;1(3):e101-e102. doi:10.1016/S2666-5247(20)30056-2
4. Mina MJ, Andersen KG. COVID-19 testing: One size does not fit all. *Science*. Published online December 21, 2020. doi:10.1126/science.abe9187
5. WHO Emergency Use Listing for In vitro diagnostics (IVDs) Detecting SARS-CoV-2. Accessed January 1, 2021. <https://www.who.int/publications/m/item/200922-eul-sars-cov2-product-list>
6. Gremmels H, Winkel BMF, Schuurman R, et al. Real-life validation of the Panbio™ COVID-19 antigen rapid test (Abbott) in community-dwelling subjects with symptoms of potential SARS-CoV-2 infection. *EClinicalMedicine*. 2020;0(0). doi:10.1016/j.eclinm.2020.100677
7. Linares M, Pérez-Tanoira R, Carrero A, et al. Panbio antigen rapid test is reliable to diagnose SARS-CoV-2 infection in the first 7 days after the onset of symptoms. *J Clin Virol*. 2020;133:104659. doi:10.1016/j.jcv.2020.104659
8. Pullano G, Di Domenico L, Sabbatini CE, et al. Underdetection of COVID-19 cases in

France threatens epidemic control. *Nature*. Published online December 21, 2020:1-9.

doi:10.1038/s41586-020-03095-6

9. Salud S de. Lineamiento Estandarizado para la Vigilancia Epidemiológica y por Laboratorio de la enfermedad respiratoria viral. gob.mx. Accessed January 1, 2021.

<http://www.gob.mx/salud/documentos/lineamiento-estandarizado-para-la-vigilancia-epidemiologica-y-por-laboratorio-de-la-enfermedad-respiratoria-viral>

10. Salud S de. Datos Abiertos Dirección General de Epidemiología. gob.mx. Accessed January 1, 2021. <http://www.gob.mx/salud/documentos/datos-abiertos-152127>

11. Korevaar DA, Cohen JF, Reitsma JB, et al. Updating standards for reporting diagnostic accuracy: the development of STARD 2015. *Res Integr Peer Rev*. 2016;1(1):7.

doi:10.1186/s41073-016-0014-7

12. Bello-Chavolla OY, Bahena-López JP, Antonio-Villa NE, et al. Predicting Mortality Due to SARS-CoV-2: A Mechanistic Score Relating Obesity and Diabetes to COVID-19 Outcomes in Mexico. *J Clin Endocrinol Metab*. 2020;105(8):2752-2761. doi:10.1210/clinem/dgaa346

13. Salud S de. Listado de pruebas de antígeno para SARS CoV 2. gob.mx. Accessed January 1, 2021. <http://www.gob.mx/salud/documentos/listado-de-pruebas-de-antigeno-para-sars-cov-2>

14. COVID-19. Pruebas rápidas COVID-19 se aplican en 200 quioscos, macro quioscos y centros de salud. COVID-19. Accessed January 1, 2021.

<https://covid19.cdmx.gob.mx/comunicacion/nota/pruebas-rapidas-covid-19-se-aplican-en-200-quioscos-macro-quioscos-y-centros-de-salud>

15. Bello-Chavolla OY, González-Díaz A, Antonio-Villa NE, et al. Unequal Impact of Structural Health Determinants and Comorbidity on COVID-19 Severity and Lethality in Older Mexican Adults: Considerations Beyond Chronological Aging. *J Gerontol Ser A*.

2020;(glaa163). doi:10.1093/gerona/glaa163

16. Bubar KM, Reinholt K, Kissler SM, et al. Model-informed COVID-19 vaccine



prioritization strategies by age and serostatus. *medRxiv*. Published online December 7,

2020:2020.09.08.20190629. doi:10.1101/2020.09.08.20190629

17. Mina MJ, Parker R, Larremore DB. Rethinking Covid-19 Test Sensitivity — A Strategy for Containment. *N Engl J Med*. Published online September 30, 2020.

doi:10.1056/NEJMp2025631

18. Li R, Pei S, Chen B, et al. Substantial undocumented infection facilitates the rapid dissemination of novel coronavirus (SARS-CoV-2). *Science*. 2020;368(6490):489-493.

doi:10.1126/science.abb3221

19. Dinnes J, Deeks JJ, Adriano A, et al. Rapid, point-of-care antigen and molecular-based tests for diagnosis of SARS-CoV-2 infection. *Cochrane Database Syst Rev*. 2020;(8).

doi:10.1002/14651858.CD013705

20. Carpenter CR. Rapid antigen and molecular tests had varied sensitivity and  $\geq 97\%$  specificity for detecting SARS-CoV-2 infection. *Ann Intern Med*. 2020;173(12):JC69.

doi:10.7326/ACPJ202012150-069

21. Lorentzen HF, Schmidt SA, Sandholdt H, Benfield T. Estimation of the diagnostic accuracy of real-time reverse transcription quantitative polymerase chain reaction for SARS-CoV-2 using re-analysis of published data. *Dan Med J*. 2020;67(9).

22. Kretzschmar ME, Rozhnova G, Bootsma MCJ, Boven M van, Wiggert JHHM van de, Bonten MJM. Impact of delays on effectiveness of contact tracing strategies for COVID-19: a modelling study. *Lancet Public Health*. 2020;5(8):e452-e459. doi:10.1016/S2468-

2667(20)30157-2

23. Bello-Chavolla OY, Antonio-Villa NE, Vargas-Vázquez A, Fermín-Martínez CA, Márquez-Salinas A, Bahena-López JP. Profiling Cases With Nonrespiratory Symptoms and Asymptomatic Severe Acute Respiratory Syndrome Coronavirus 2 Infections in Mexico City.

*Clin Infect Dis*. 2020;(ciaa1288). doi:10.1093/cid/ciaa1288

24. Struyf T, Deeks JJ, Dinnes J, et al. Signs and symptoms to determine if a patient

presenting in primary care or hospital outpatient settings has COVID-19 disease. *Cochrane Database Syst Rev.* 2020;(7). doi:10.1002/14651858.CD013665

25. Antonio-Villa NE, Bello-Chavolla OY, Vargas-Vázquez A, Fermín-Martínez CA, Márquez-Salinas A, Bahena-López JP. Health-care workers with COVID-19 living in Mexico City: clinical characterization and related outcomes. *Clin Infect Dis.* 2020;(ciaa1487).

doi:10.1093/cid/ciaa1487

26. Slifka MK, Gao L. Is presymptomatic spread a major contributor to COVID-19 transmission? *Nat Med.* 2020;26(10):1531-1533. doi:10.1038/s41591-020-1046-6

27. Sayampanathan AA, Heng CS, Pin PH, Pang J, Leong TY, Lee VJ. Infectivity of asymptomatic versus symptomatic COVID-19. *The Lancet.* 2020;0(0). doi:10.1016/S0140-6736(20)32651-9

28. Suri T, Mittal S, Tiwari P, et al. COVID-19 Real-Time RT-PCR: Does Positivity on Follow-up RT-PCR Always Imply Infectivity? *Am J Respir Crit Care Med.* 2020;202(1):147-147. doi:10.1164/rccm.202004-1287LE

29. Kucirka LM, Lauer SA, Laeyendecker O, Boon D, Lessler J. Variation in False-Negative Rate of Reverse Transcriptase Polymerase Chain Reaction-Based SARS-CoV-2 Tests by Time Since Exposure. *Ann Intern Med.* 2020;173(4):262-267. doi:10.7326/M20-1495

30. Cento V, Colagrossi L, Nava A, et al. Persistent positivity and fluctuations of SARS-CoV-2 RNA in clinically-recovered COVID-19 patients. *J Infect.* 2020;81(3):e90-e92.

doi:10.1016/j.jinf.2020.06.024

31. Kohn MA, Carpenter CR, Newman TB. Understanding the direction of bias in studies of diagnostic test accuracy. *Acad Emerg Med Off J Soc Acad Emerg Med.* 2013;20(11):1194-1206. doi:10.1111/acem.12255

32. Long Q-X, Tang X-J, Shi Q-L, et al. Clinical and immunological assessment of asymptomatic SARS-CoV-2 infections. *Nat Med.* 2020;26(8):1200-1204. doi:10.1038/s41591-020-0965-6

33. Sudre CH, Lee K, Lochlainn MN, et al. Symptom clusters in Covid19: A potential clinical prediction tool from the COVID Symptom study app. *medRxiv*. Published online June 16, 2020:2020.06.12.20129056. doi:10.1101/2020.06.12.20129056
34. Guglielmi G. Fast coronavirus tests: what they can and can't do. *Nature*. 2020;585(7826):496-498. doi:10.1038/d41586-020-02661-2

## TABLES

**Table 1.** Characteristics of subjects tested for SARS-CoV-2 infection in Mexico, comparing cases who were tested using RT-PCR, rapid antigen tests and a combination of both.

**Abbreviations:** RT-PCR: Reverse transcription polymerase chain reaction; CKD, Chronic Kidney Disease; CVD: cardiovascular disease; COPD: Chronic Obstructive Pulmonary Disease; OR: Odds Ratio; 95%CI: 95% Confidence interval, ICU: Intensive Care Unit.

| Parameters               | RT-PCR test<br>n=3009578 | Rapid antigen test<br>n=340484 | Both tests<br>n=24103 | p-value |
|--------------------------|--------------------------|--------------------------------|-----------------------|---------|
| Age (years)              | 41.6±17                  | 38.6±16.1                      | 40.8±16.5             | <0.001  |
| Male sex (%)             | 1,453,173 (48.3)         | 159,819 (46.9)                 | 11,024 (45.7)         | <0.001  |
| Confirmed SARS-CoV-2 (%) | 1,275,339 (42.4)         | 84,608 (24.8)                  | 9,421 (39.1)          | <0.001  |
| Diabetes (%)             | 346,166 (11.5)           | 22,507 (6.6)                   | 2,446 (10.1)          | <0.001  |
| COPD (%)                 | 35,236 (1.2)             | 1,180 (0.3)                    | 165 (0.7)             | <0.001  |
| Asthma (%)               | 81,530 (2.7)             | 6,578 (1.9)                    | 619 (2.6)             | <0.001  |
| Immunosuppression (%)    | 32,354 (1.1)             | 1,289 (0.4)                    | 188 (0.8)             | <0.001  |
| Hypertension (%)         | 465,640 (15.5)           | 31,064 (9.1)                   | 3,226 (13.4)          | <0.001  |
| Other (%)                | 66,550 (2.2)             | 518 (0.2)                      | 295 (1.2)             | <0.001  |
| CVD (%)                  | 51,871 (1.7)             | 2,458 (0.7)                    | 324 (1.3)             | <0.001  |
| Obesity                  | 422,000 (14)             | 24,962 (7.3)                   | 2,723 (11.3)          | <0.001  |
| CKD (%)                  | 48,518 (1.6)             | 1,323 (0.4)                    | 274 (1.1)             | <0.001  |
| Smoking (%)              | 247,446 (8.2)            | 35,328 (10.4)                  | 2,536 (10.5)          | <0.001  |

| Parameters                 | RT-PCR test<br>n=3009578 | Rapid antigen test<br>n=340484 | Both tests<br>n=24103 | p-value |
|----------------------------|--------------------------|--------------------------------|-----------------------|---------|
| Pneumonia (%)              | 323,413 (10.7)           | 2,766 (0.8)                    | 2,434 (10.1)          | <0.001  |
| Hospitalization (%)        | 461,022 (15.3)           | 1,798 (0.5)                    | 3,110 (12.9)          | <0.001  |
| ICU admission (%)          | 417,292 (13.9)           | 1,746 (0.5)                    | 2,981 (12.4)          | <0.001  |
| Death (%)                  | 158,148 (5.3)            | 341 (0.1)                      | 616 (2.6)             | <0.001  |
| Time to assessment* (days) | 3 (1-5)                  | 2 (0-4)                        | 3 (1-5)               | <0.001  |

**Table 2.** Overall diagnostic performance metrics of rapid antigen tests to detect SARS-CoV-2 infection compared to RT-PCR in Mexico and stratification by region of testing, patient setting, comorbidity, age and days from symptom onset to evaluation.

**Abbreviations:** FP: False positive; FN: False negative; PPV: Positive Predictive Value; NPV: Negative Predictive Value, LR+: Positive Likelihood Ratio, LR-: Negative Likelihood Ratio, RT-PCR: Reverse transcription polymerase chain reaction; AUROC: Area under the receiving operating characteristic curve.

| Parameter        | FP/FN     | AUROC<br>(95%CI)       | Sensitivity<br>(%, 95%CI) | Specificity<br>(%, 95%CI) | PPV<br>(%, 95%CI)   | NPV<br>(%, 95%CI)   | LR+<br>(95%CI)      | LR-<br>(95%CI)      |
|------------------|-----------|------------------------|---------------------------|---------------------------|---------------------|---------------------|---------------------|---------------------|
| Overall          | 479./4917 | 0.666<br>(0.66-0.671)  | 37.6<br>(36.6-38.7)       | 95.5<br>(95.1-95.9)       | 86.1<br>(85-86.6)   | 67.2<br>(66.2-69.2) | 8.3<br>(7.6-9.1)    | 0.65<br>(0.64-0.66) |
| Mexico City      | 255/4108  | 0.658<br>(0.652-0.664) | 34.5<br>(33.3-35.6)       | 97.1<br>(96.8-97.5)       | 89.4<br>(88.2-89.9) | 67.8<br>(66.6-70.5) | 12.0<br>(10.6-13.6) | 0.67<br>(0.66-0.69) |
| Rest of Mexico   | 224/809   | 0.683<br>(0.668-0.698) | 50.0<br>(47.5-52.5)       | 86.6<br>(84.9-88.2)       | 78.3<br>(75.8-79.9) | 64.2<br>(61.9-67.5) | 3.7<br>(3.3-4.3)    | 0.58<br>(0.55-0.61) |
| Outpatient       | 370/4195  | 0.652<br>(0.646-0.658) | 34.2<br>(33.1-35.4)       | 96.2<br>(95.8-96.6)       | 85.5<br>(84.2-86.2) | 69.1<br>(68-71.4)   | 9.0<br>(8.1-10.0)   | 0.68<br>(0.67-0.70) |
| Inpatient        | 109/722   | 0.692<br>(0.674-0.709) | 52.0<br>(49.5-54.6)       | 86.3<br>(83.8-88.6)       | 87.8<br>(85.4-88.8) | 48.8<br>(46.3-54.1) | 3.8<br>(3.2-4.6)    | 0.56<br>(0.52-0.59) |
| No comorbidities | 294/3092  | 0.660<br>(0.653-0.667) | 36.3<br>(35-37.7)         | 95.7<br>(95.2-96.2)       | 85.7<br>(84.2-86.4) | 67.8<br>(66.5-70.4) | 8.4<br>(7.5-9.5)    | 0.67<br>(0.65-0.68) |
| ≥1 comorbidity   | 182/1811  | 0.674<br>(0.665-0.684) | 39.7<br>(38-41.5)         | 95.1<br>(94.4-95.8)       | 86.8<br>(85-87.6)   | 66.1<br>(64.5-69.5) | 8.1<br>(7.0-9.4)    | 0.63<br>(0.61-0.65) |

| Parameter         | FP/FN    | AUROC<br>(95%CI)       | Sensitivity<br>(%, 95%CI) | Specificity<br>(%, 95%CI) | PPV<br>(%, 95%CI)   | NPV<br>(%, 95%CI)   | LR+<br>(95%CI)   | LR-<br>(95%CI)      |
|-------------------|----------|------------------------|---------------------------|---------------------------|---------------------|---------------------|------------------|---------------------|
| <60 years         | 392/4164 | 0.657<br>(0.651-0.663) | 35.6<br>(34.4-36.8)       | 95.8<br>(95.4-96.2)       | 85.4<br>(84.1-86.1) | 68.3<br>(67.2-70.5) | 8.5<br>(7.7-9.4) | 0.67<br>(0.66-0.69) |
| ≥60 years         | 87/753   | 0.699<br>(0.684-0.714) | 47.0<br>(44.4-49.7)       | 92.7<br>(91.1-94.1)       | 88.5<br>(86.1-89.5) | 59.6<br>(57-65)     | 6.5<br>(5.2-8)   | 0.57<br>(0.54-0.6)  |
| <7d from<br>onset | 432/4050 | 0.674<br>(0.668-0.68)  | 39.3<br>(38.1-40.5)       | 95.5<br>(95.1-95.9)       | 85.8<br>(84.6-86.4) | 69.5<br>(68.4-71.5) | 8.8<br>(8-9.7)   | 0.64<br>(0.62-0.65) |
| ≥7d from<br>onset | 47/867   | 0.618<br>(0.603-0.632) | 28.6<br>(26.1-31.3)       | 94.9<br>(93.2-96.2)       | 88.1<br>(84.7-89.4) | 50.1<br>(46.9-57.9) | 5.6<br>(4.2-7.5) | 0.75<br>(0.72-0.78) |

**Table 3.** Time-dependent area under ROC curves using inverse weighted probability with Cox regression for detection of SARS-CoV-2 infection, adjusted for age assessing the performance of rapid antigen tests compared to RT-PCR at days 1, 3, 7, 10 and 15. The table also shows the ability of RT-PCR or rapid antigen tests to predict hospitalization, intubation and mortality related to COVID-19 at these different time points.

**Abbreviations:** AUROC: Area under the receiving operating characteristic curve; RT-PCR: Reverse transcription polymerase chain reaction; Ag-T: Rapid Antigen test.

| Time AUROC | RT-PCR vs. Ag-T | RT-PCR Hospitalization | Ag-T Hospitalization | RT-PCR Intubation | Ag-T Intubation | RT-PCR Mortality | Ag-T Mortality |
|------------|-----------------|------------------------|----------------------|-------------------|-----------------|------------------|----------------|
| 1 day      | 0.548           | 0.476                  | 0.546                | 0.258             | 0.341           | 0.570            | 0.628          |
| 3 days     | 0.598           | 0.520                  | 0.542                | 0.330             | 0.41            | 0.640            | 0.619          |
| 7 days     | 0.609           | 0.592                  | 0.612                | 0.391             | 0.547           | 0.673            | 0.691          |
| 10 days    | 0.593           | 0.648                  | 0.593                | 0.489             | 0.600           | 0.736            | 0.694          |
| 15 days    | 0.523           | 0.581                  | 0.523                | 0.65              | 0.503           | 0.709            | 0.417          |



## FIGURE LEGENDS

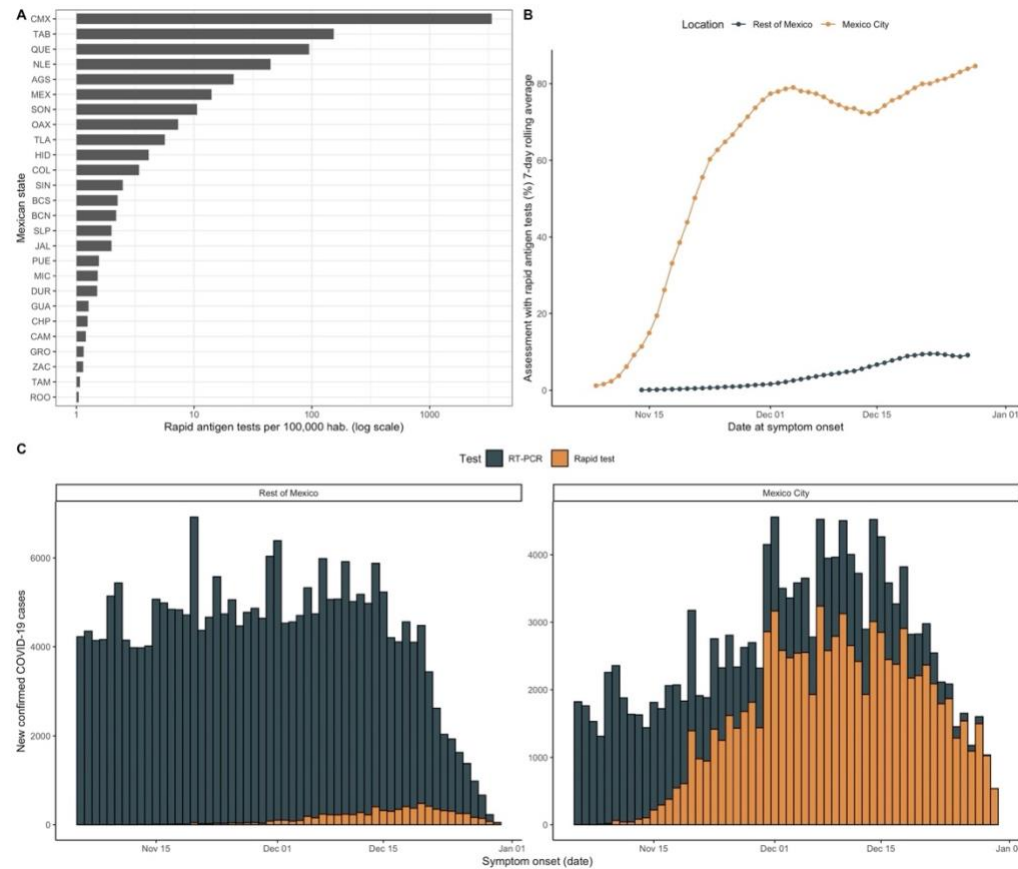

**Figure 1.** A) Number of rapid antigen tests per 100,000 population across different Mexican states. Figure also shows the percentage of rapid antigen tests amongst all SARS-CoV-2 tests administered in Mexico City and the rest of Mexico (B) and the curve of confirmed cases according to date from symptom onset in Mexico City and the rest of Mexico (C-D).

**Abbreviations:** RT-PCR: Reverse transcription polymerase chain reaction

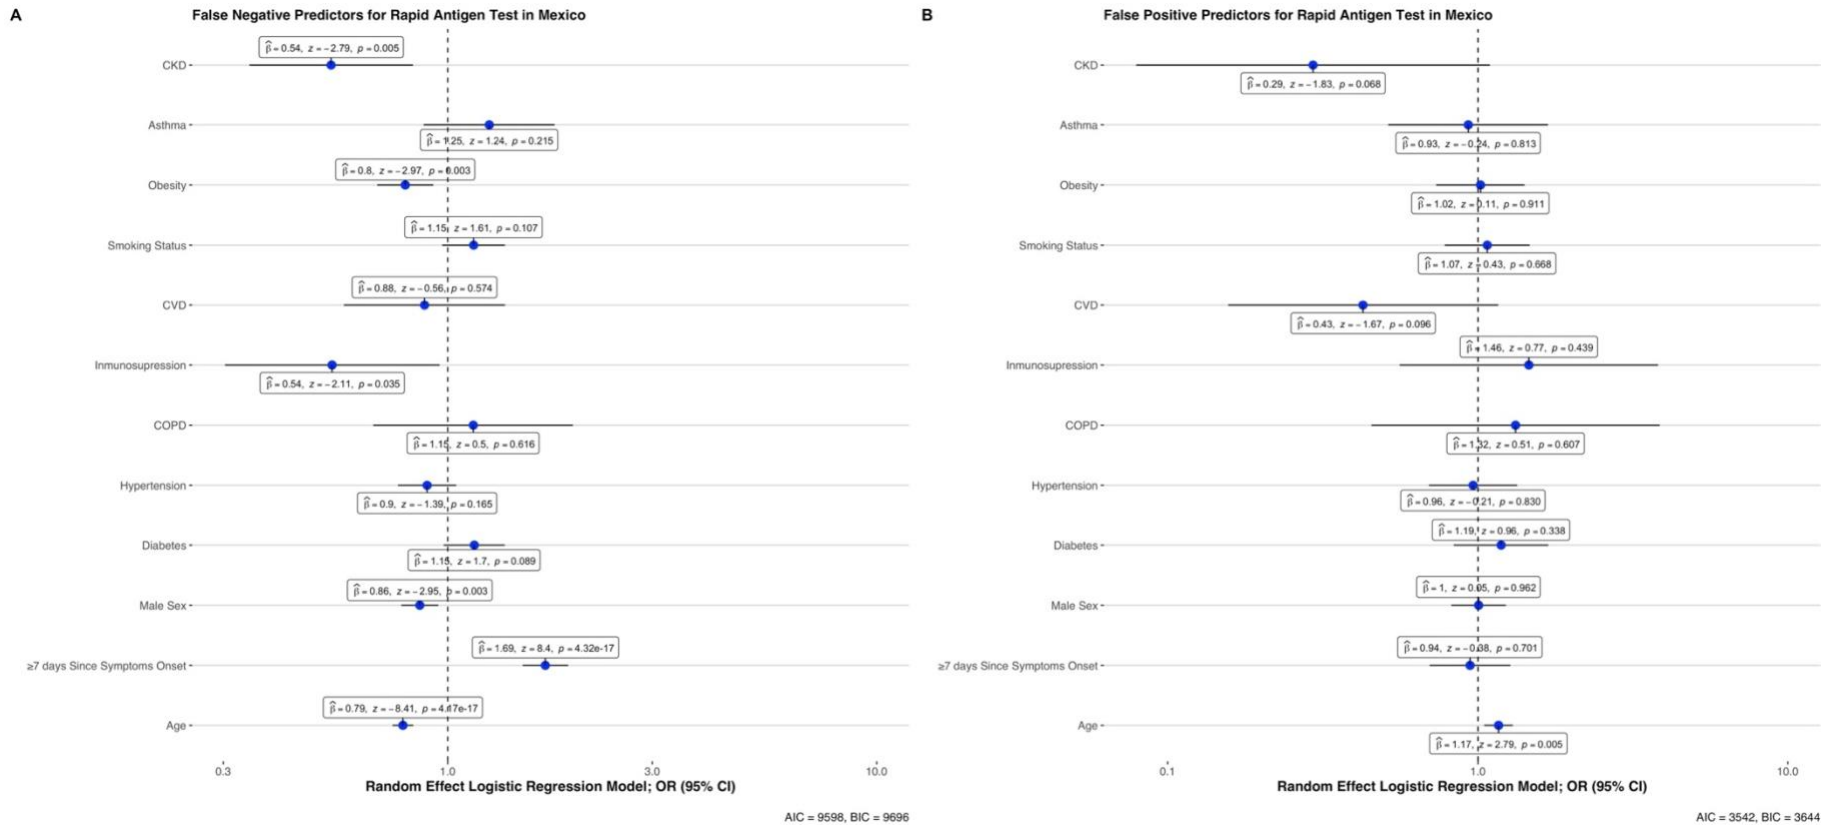

**Figure 2.** Mixed effects logistic regression models assessing predictors of cases with false negative compared to true positive test results (A) and false positive compared to true negative test results (B) using RT-PCR as reference tests.

**Abbreviations:** RT-PCR: Reverse transcription polymerase chain reaction; CKD, Chronic Kidney Disease; CVD: cardiovascular disease; COPD: Chronic Obstructive Pulmonary Disease; OR: Odds Ratio; 95%CI: 95% Confidence interval, ICU: Intensive Care Unit

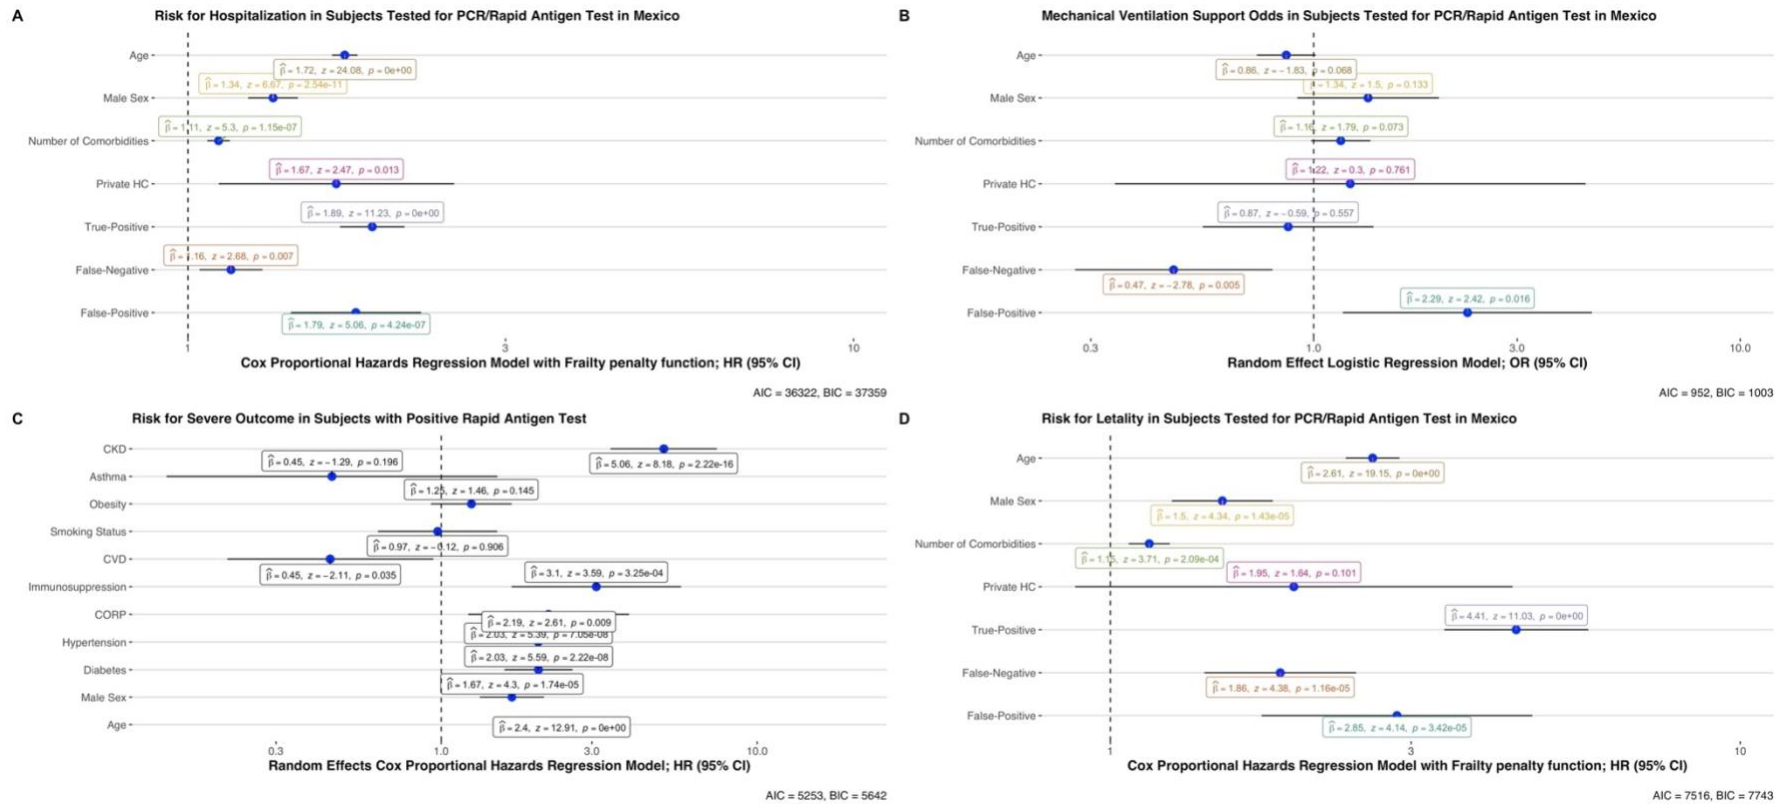

**Figure 3.** Models assessing risk associated to confusion matrix categories in rapid antigen test results compared to RT-PCR for COVID-19 outcomes including hospitalization (A), requirement for intubation (B), risk of adverse outcomes (C) and lethality (D).

**Abbreviations:** RT-PCR: Reverse transcription polymerase chain reaction; CKD, Chronic Kidney Disease; CVD: cardiovascular disease; COPD: Chronic Obstructive Pulmonary Disease; OR: Odds Ratio; HR: Hazard ratio; 95%CI: 95% Confidence interval; HC: Healthcare.

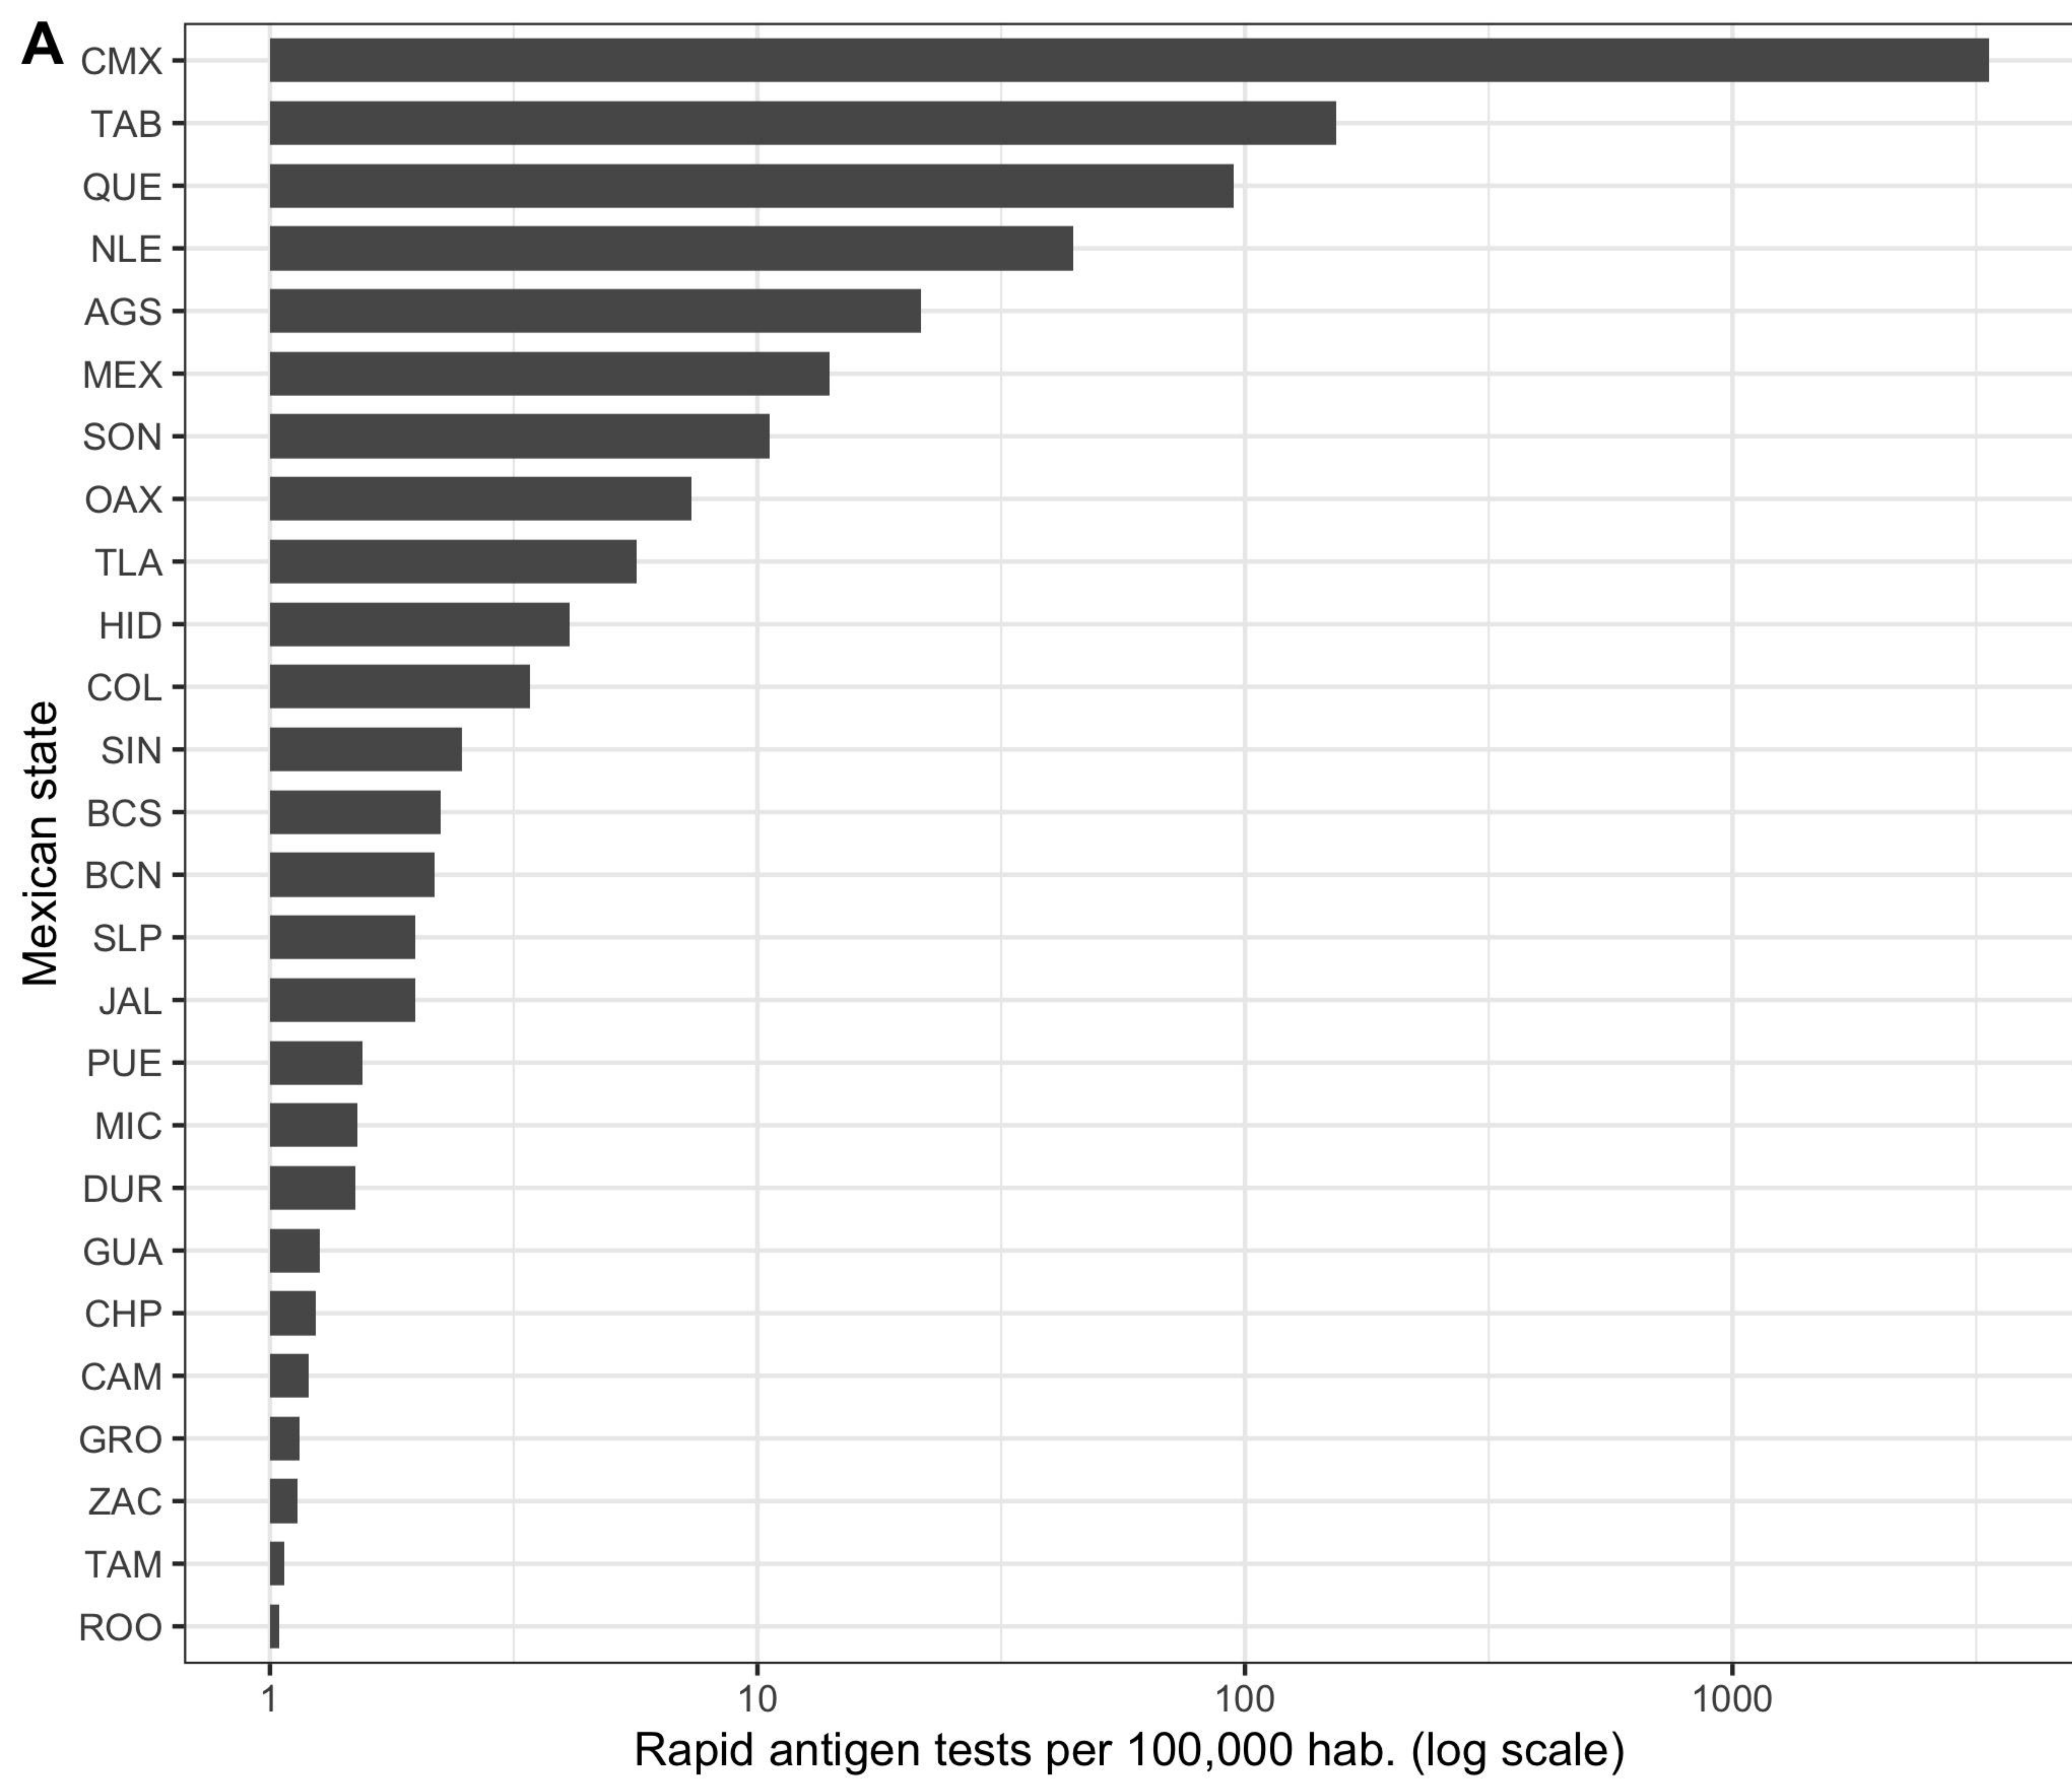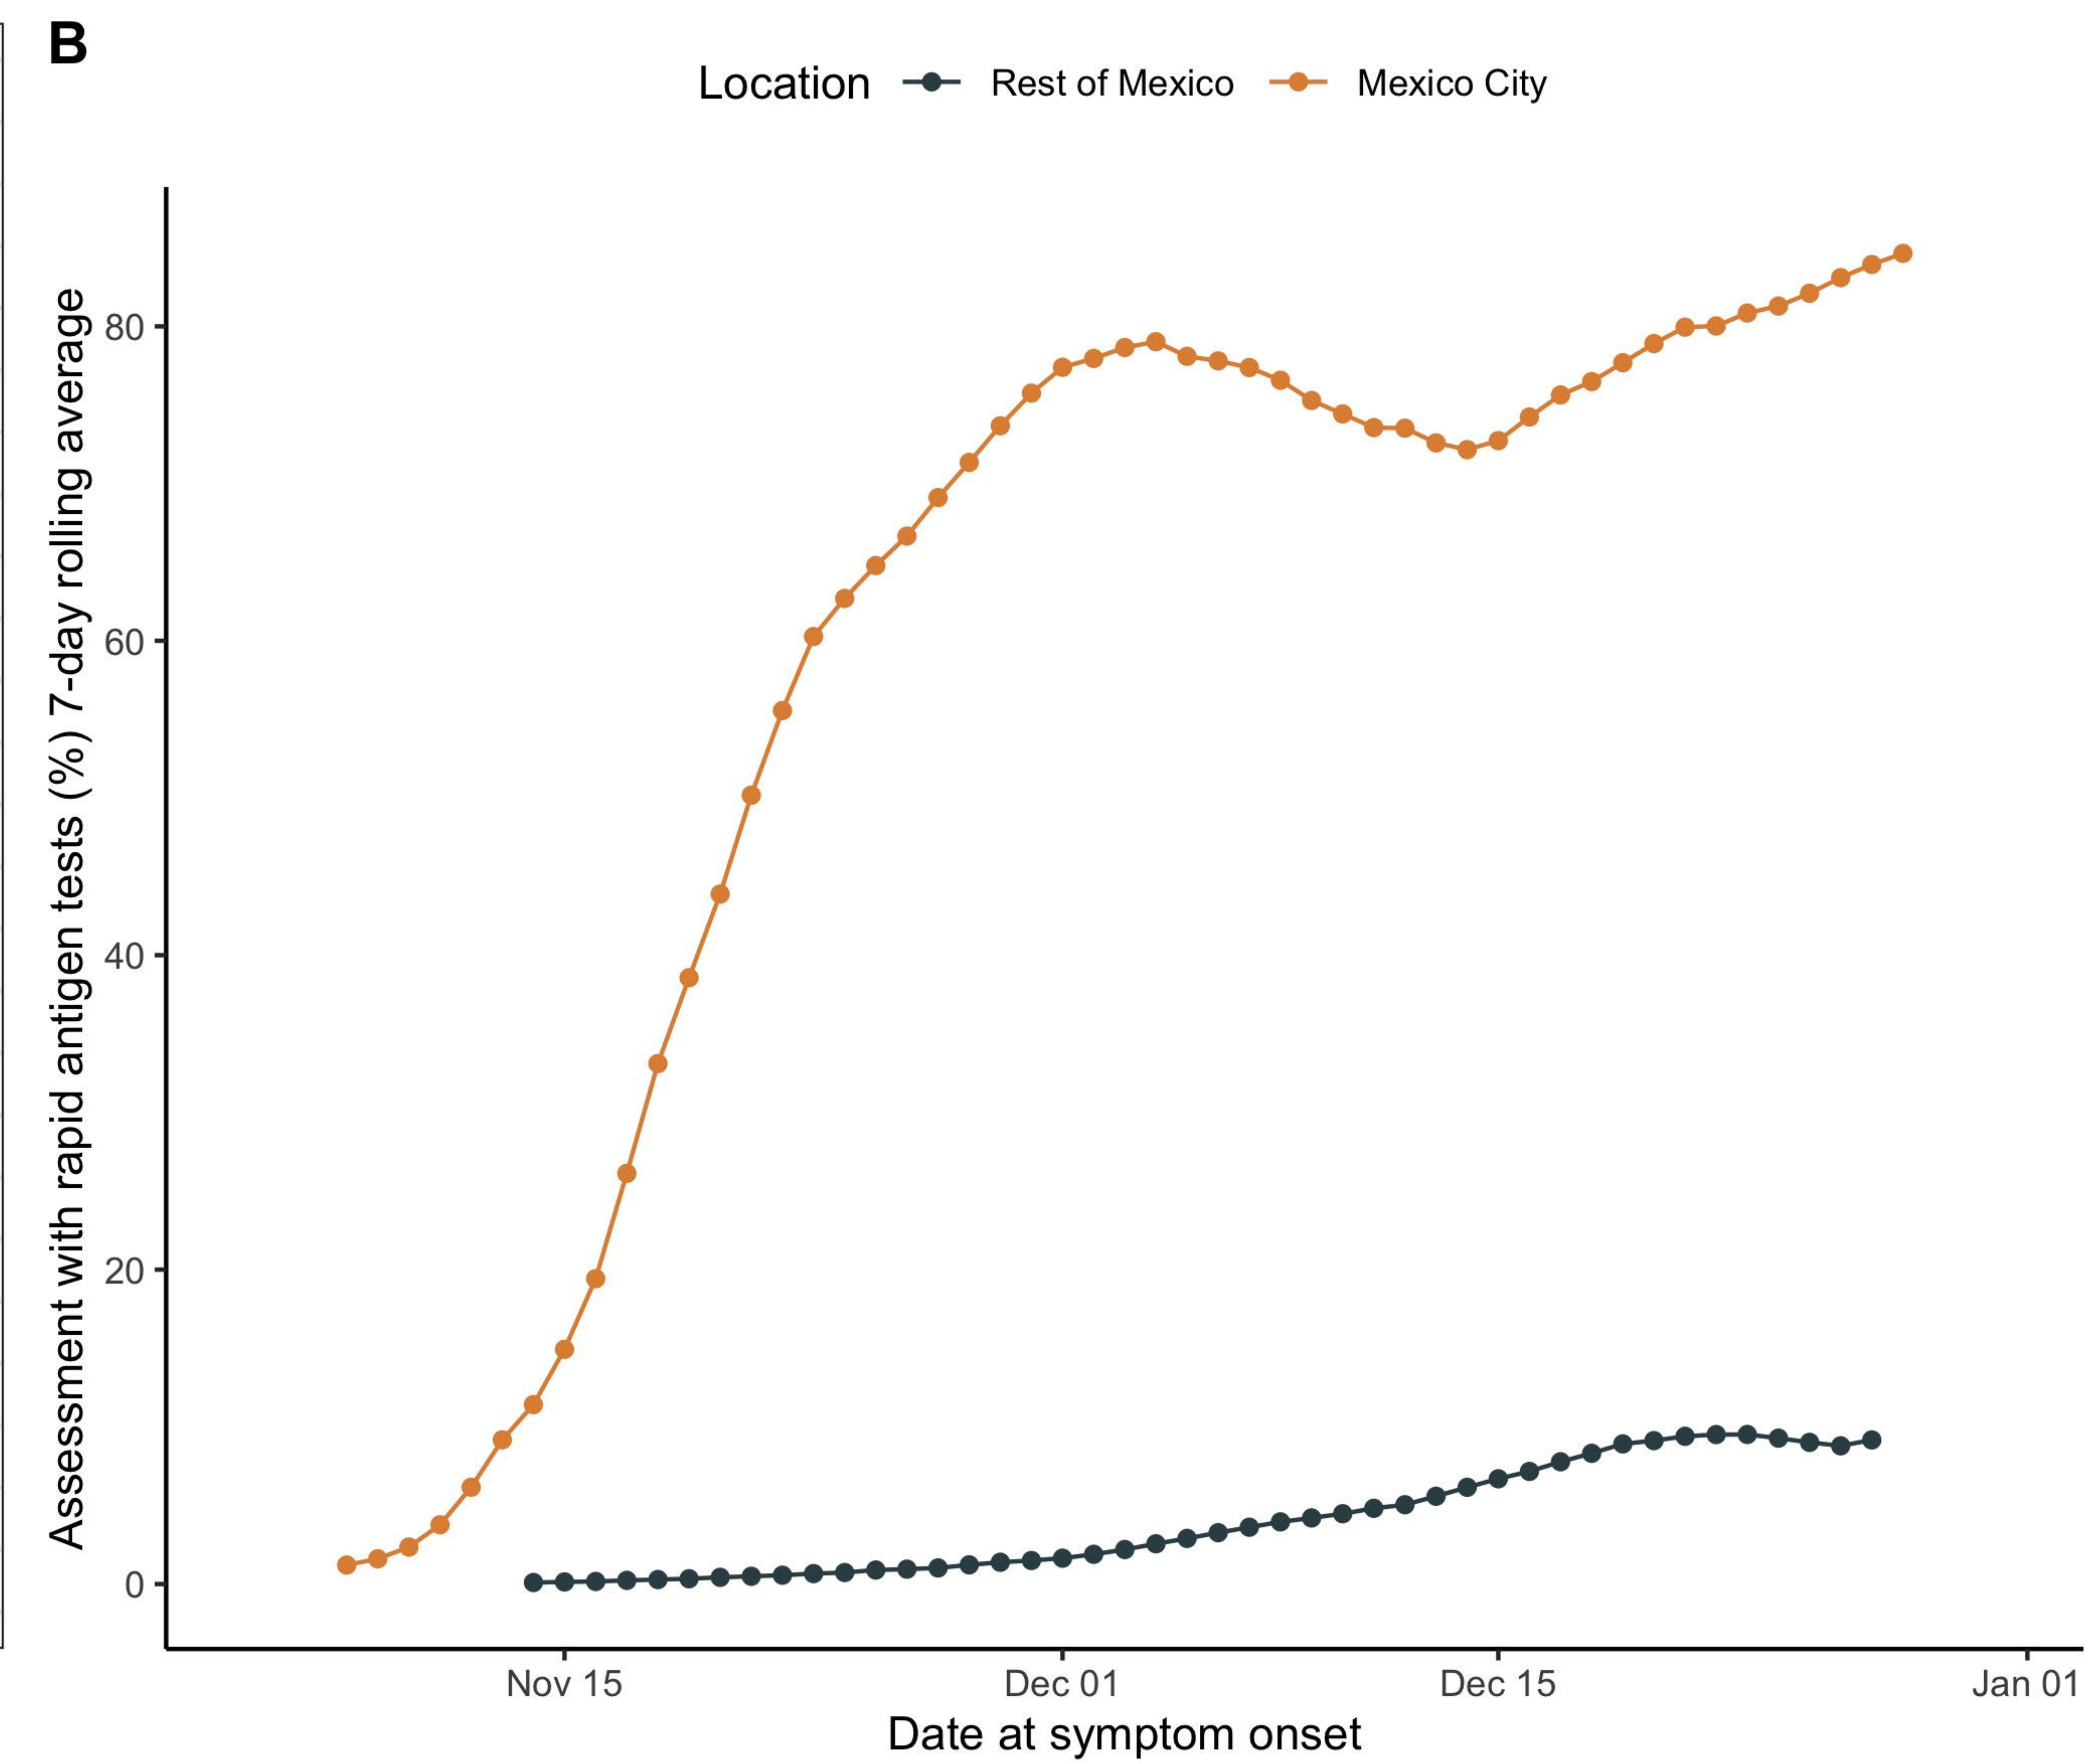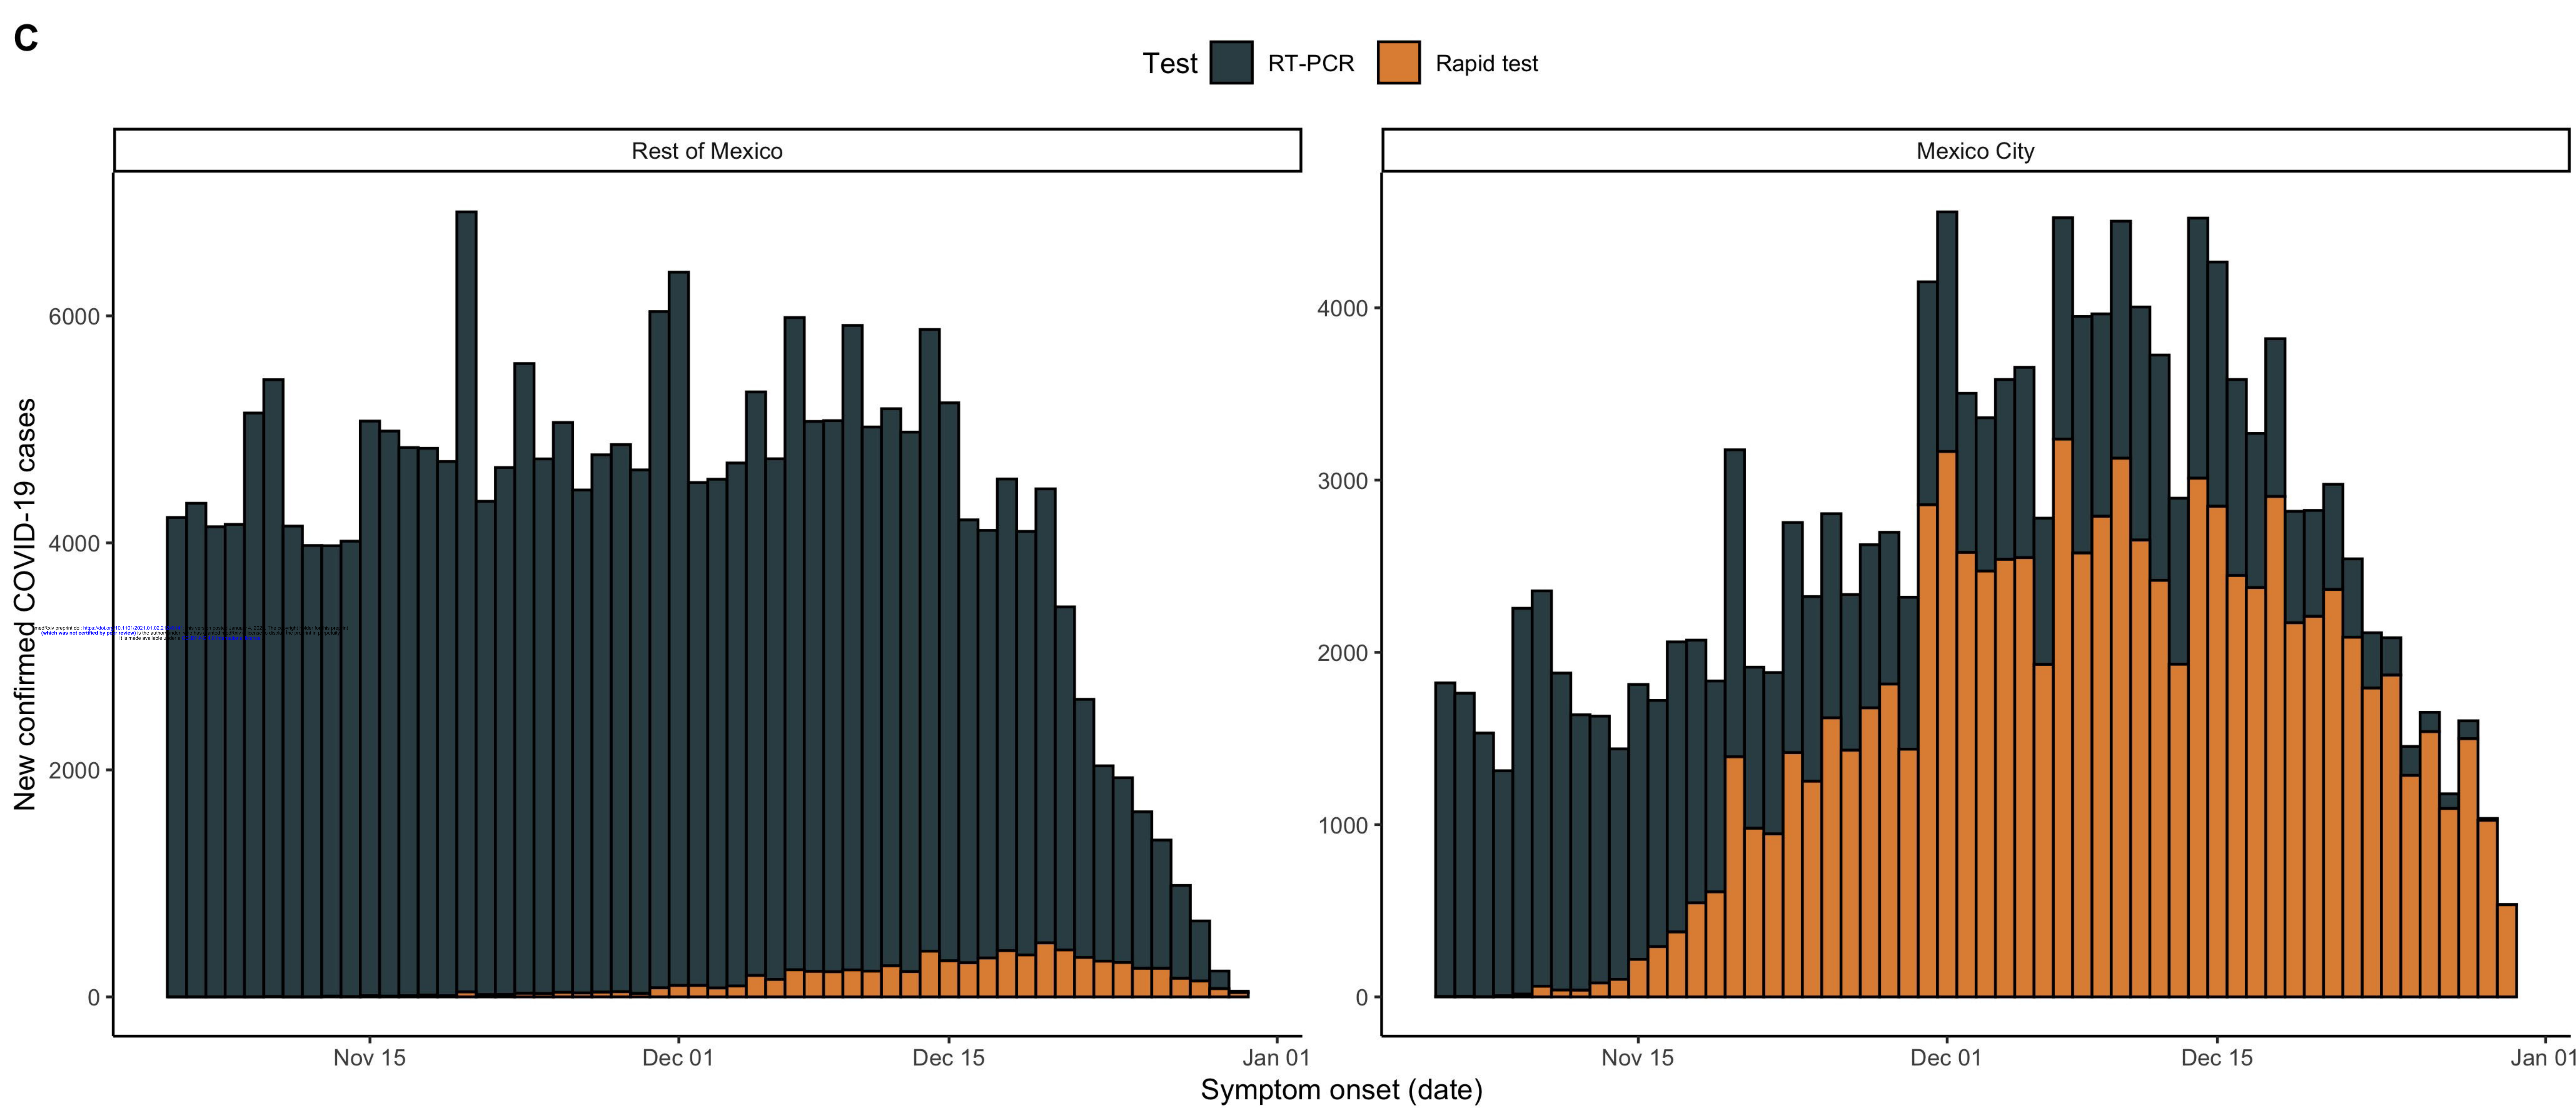

**A****False Negative Predictors for Rapid Antigen Test in Mexico**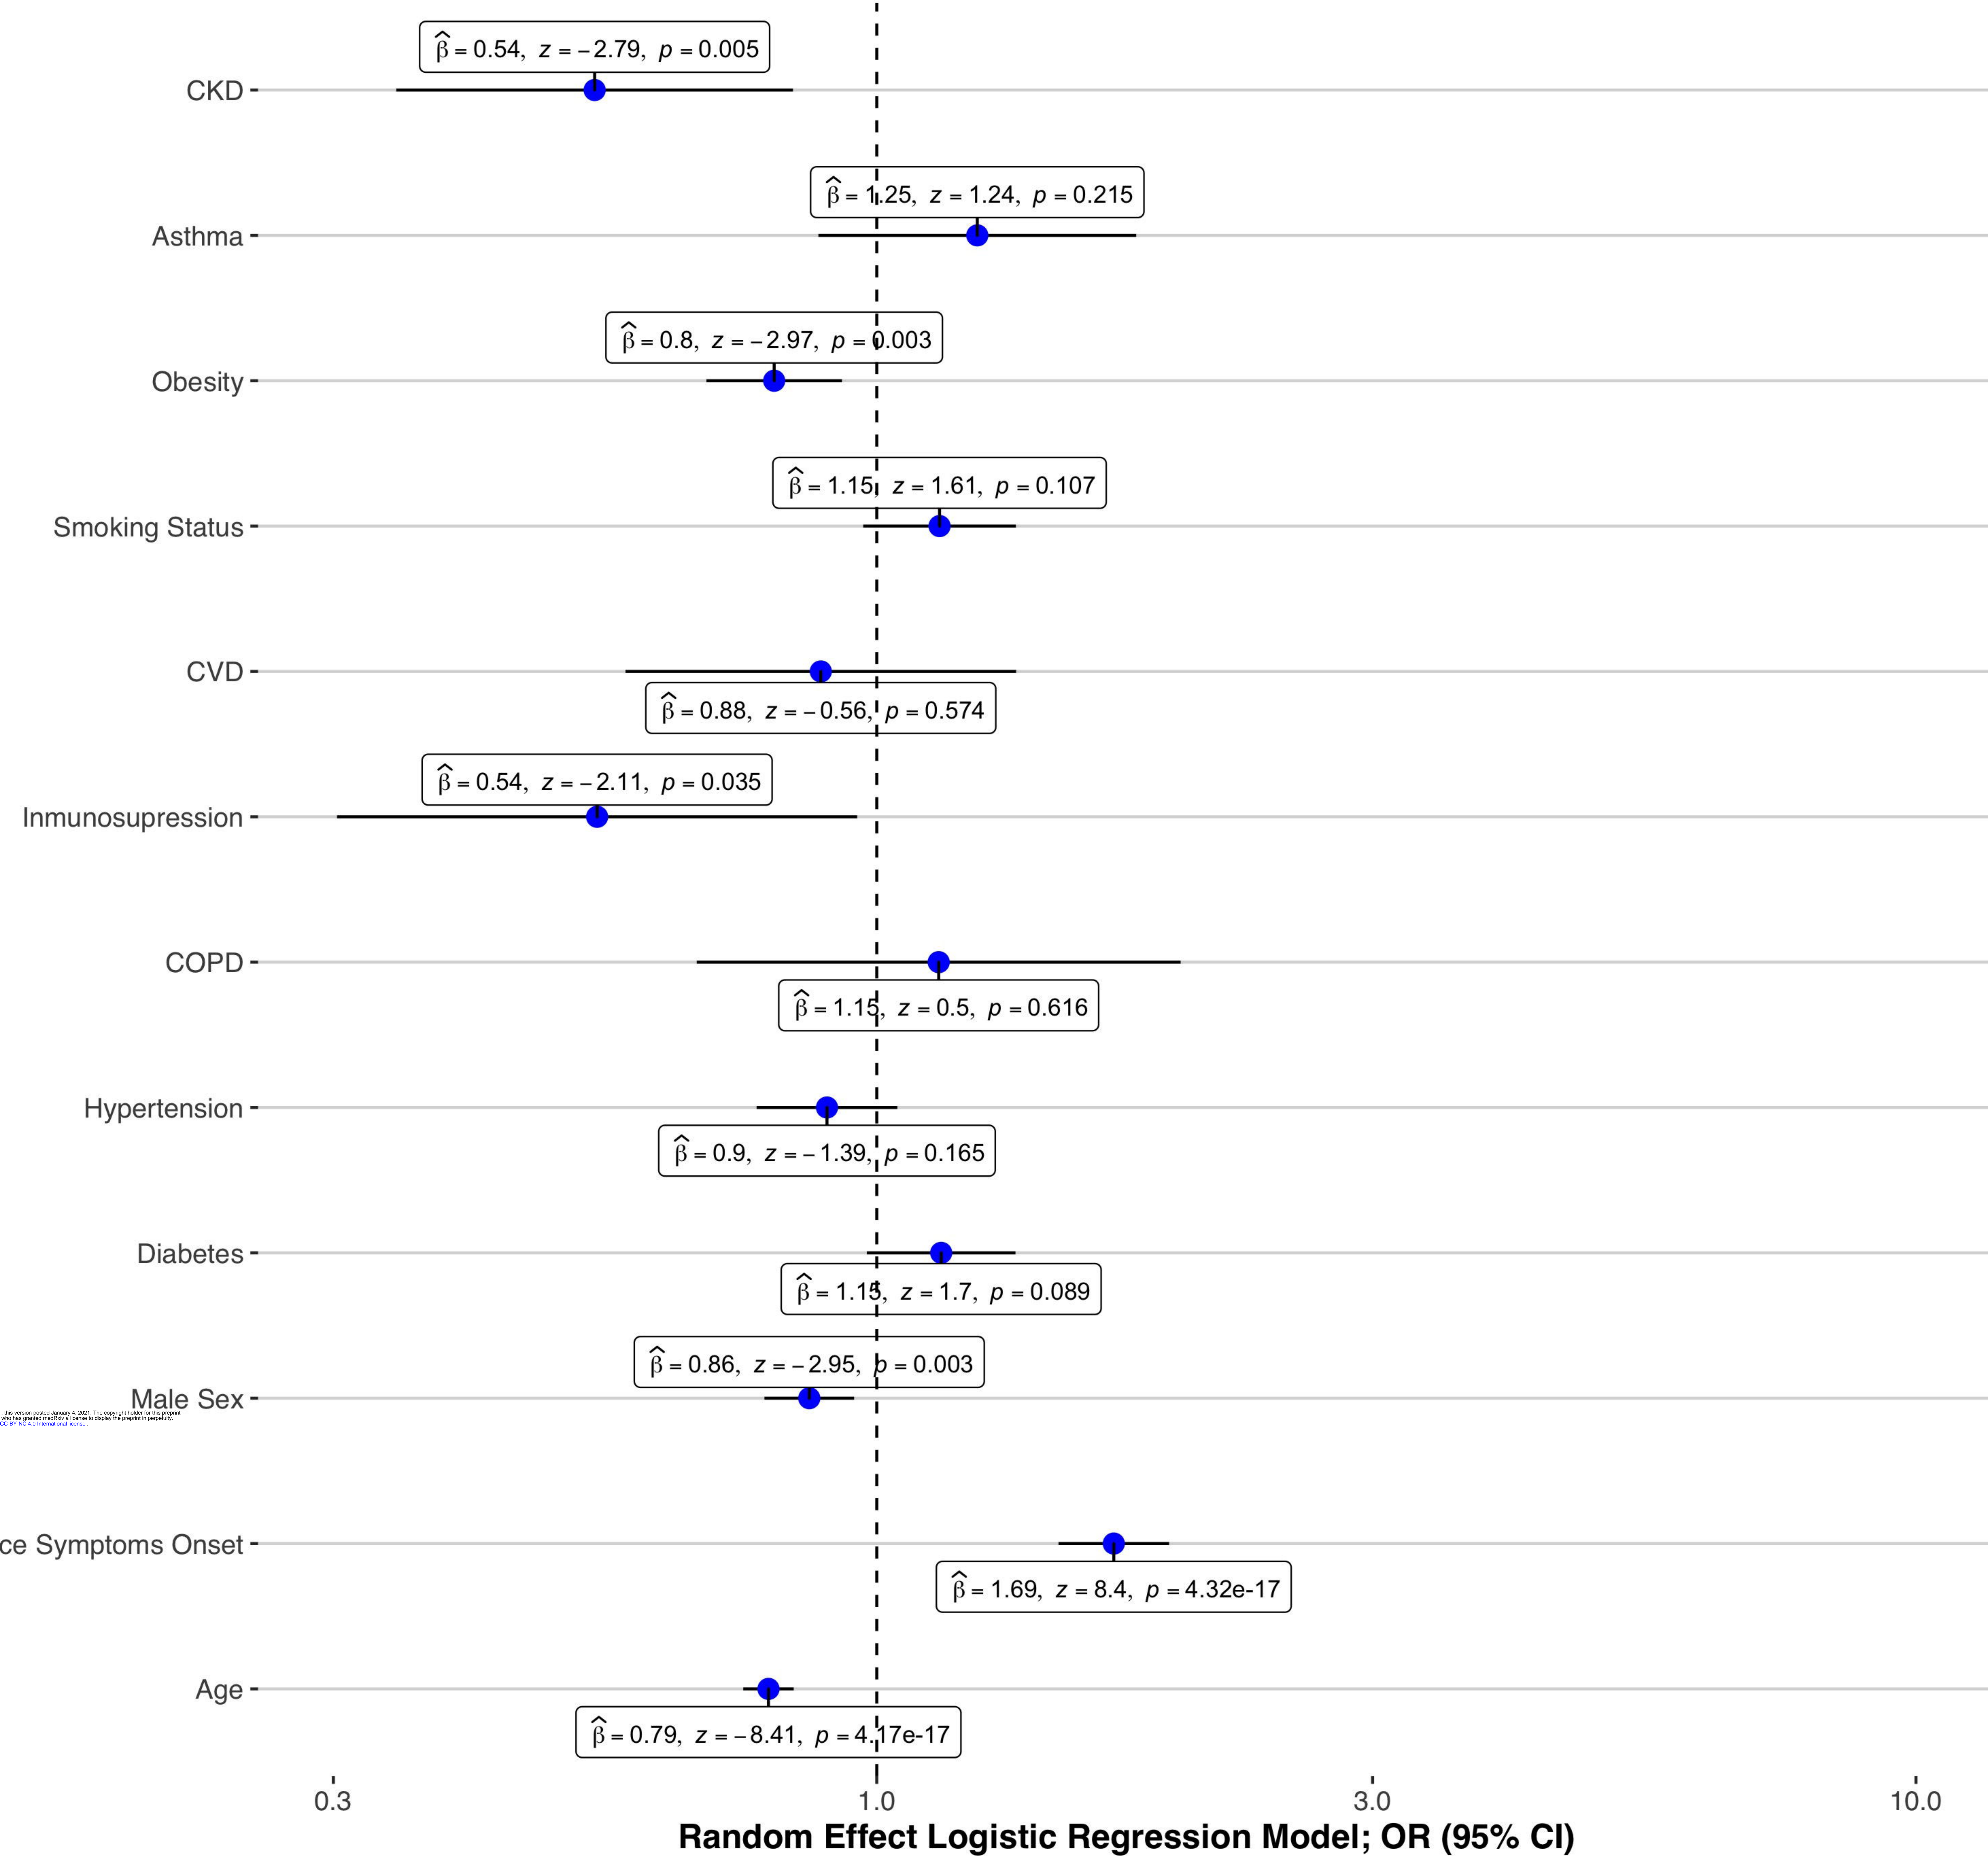

AIC = 9598, BIC = 9696

**B****False Positive Predictors for Rapid Antigen Test in Mexico**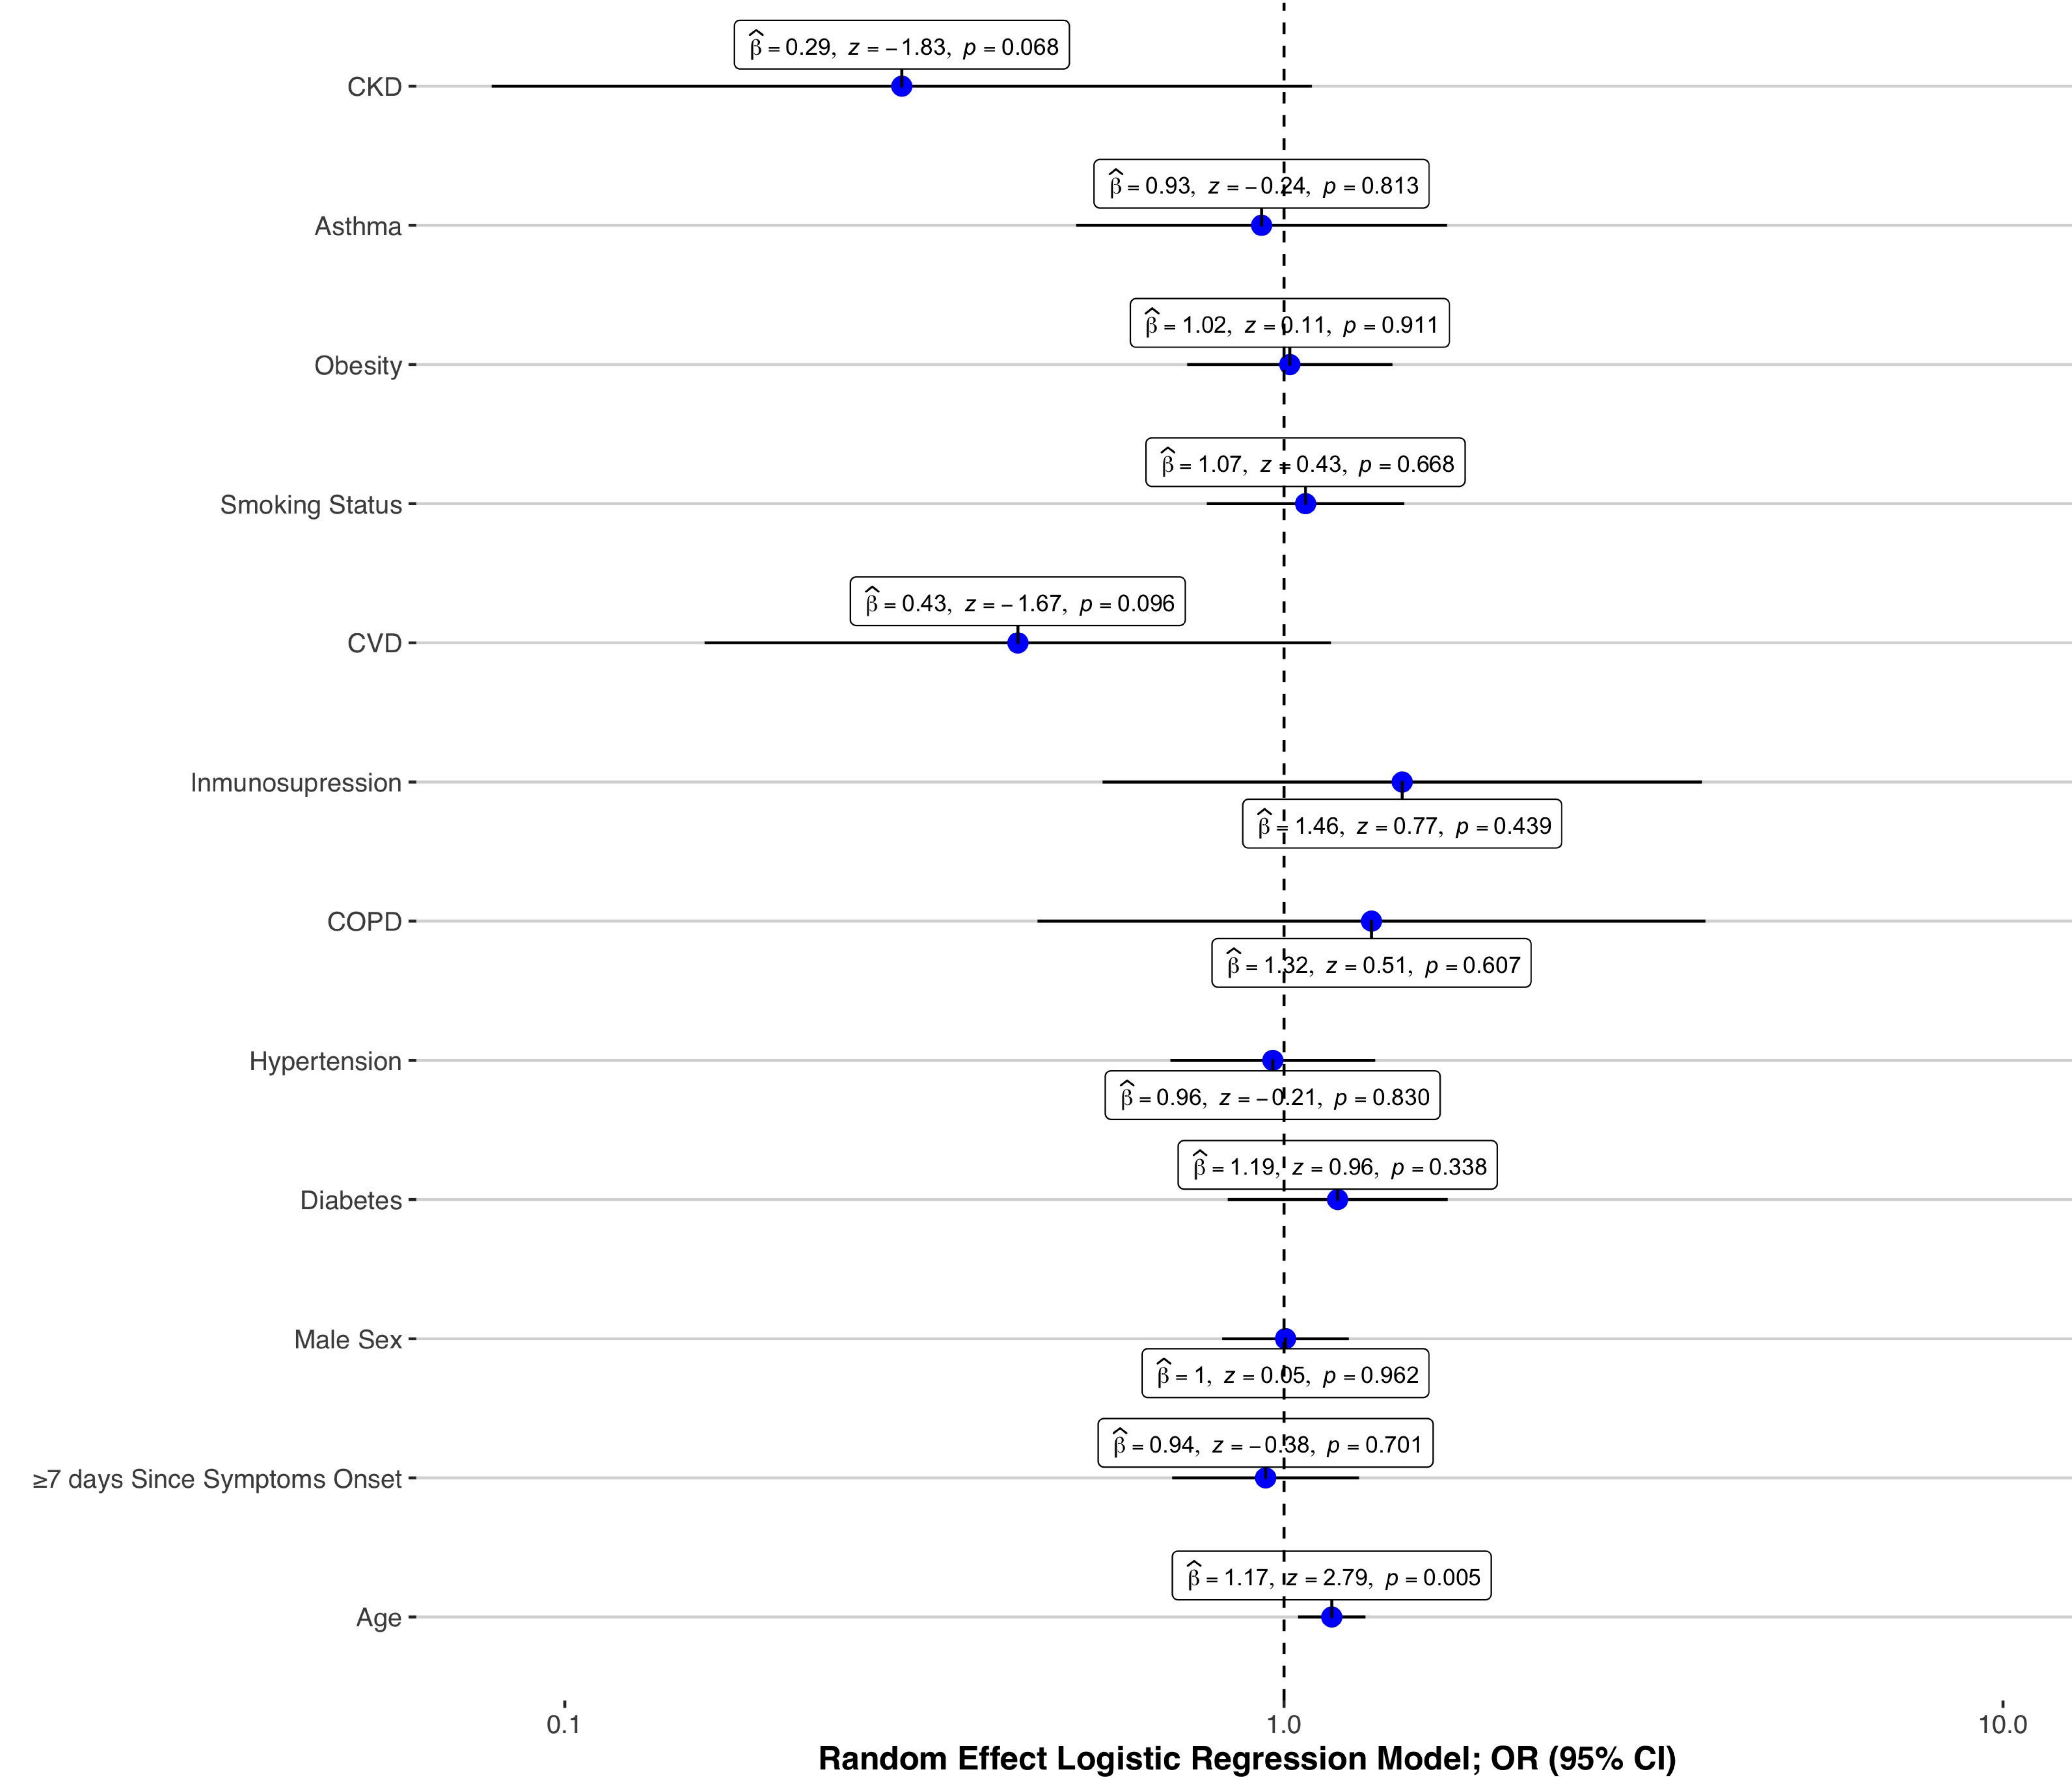

AIC = 3542, BIC = 3644

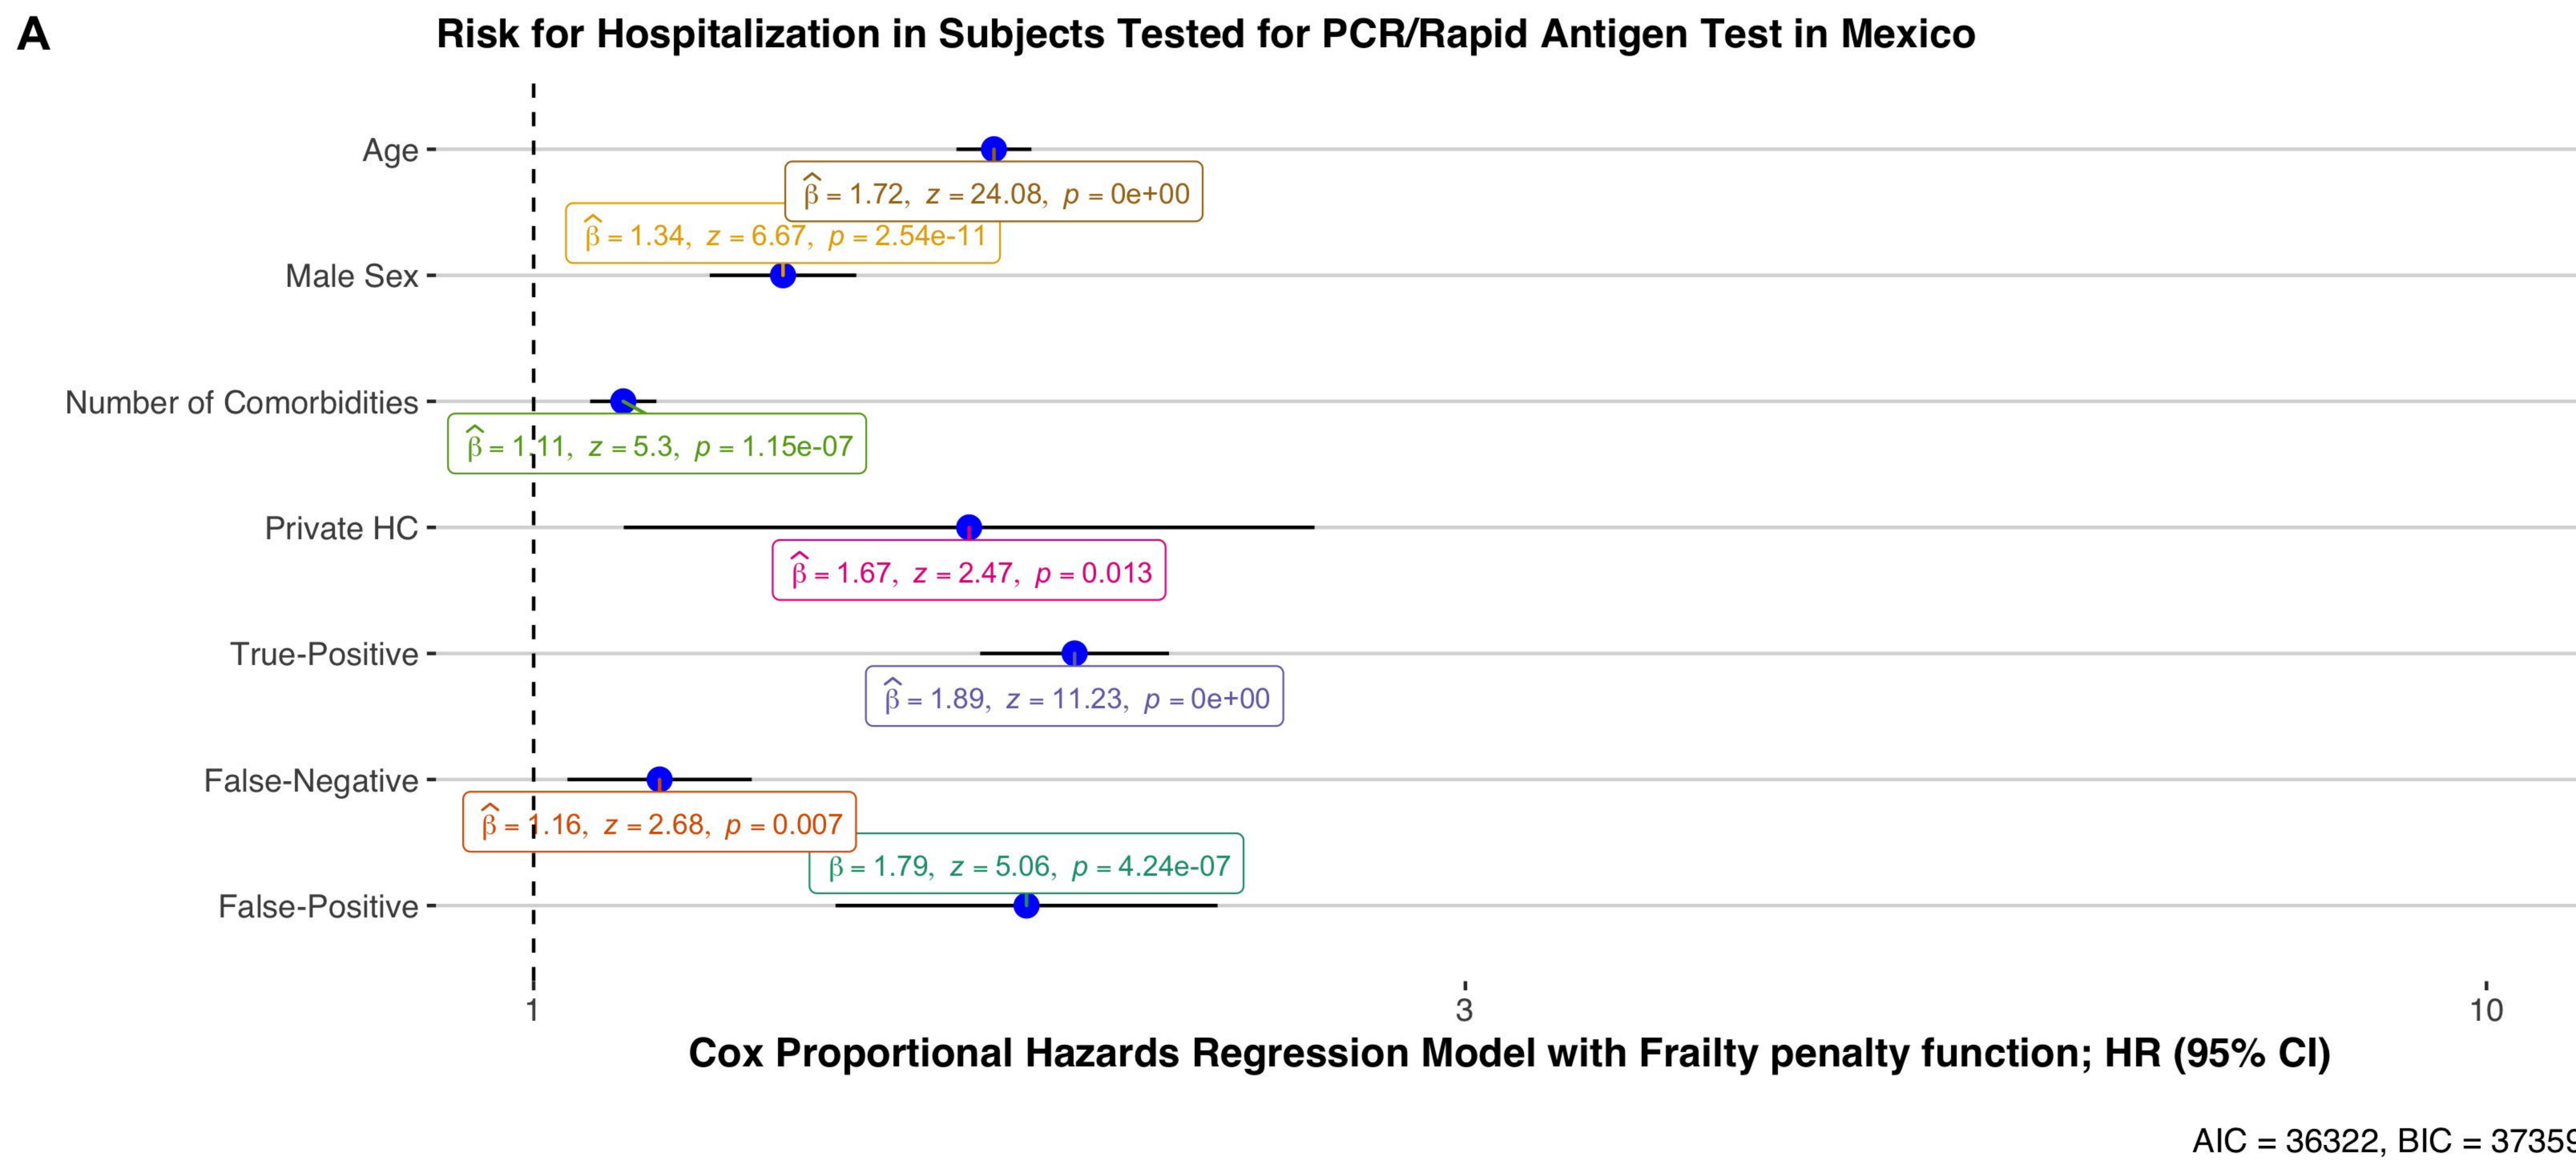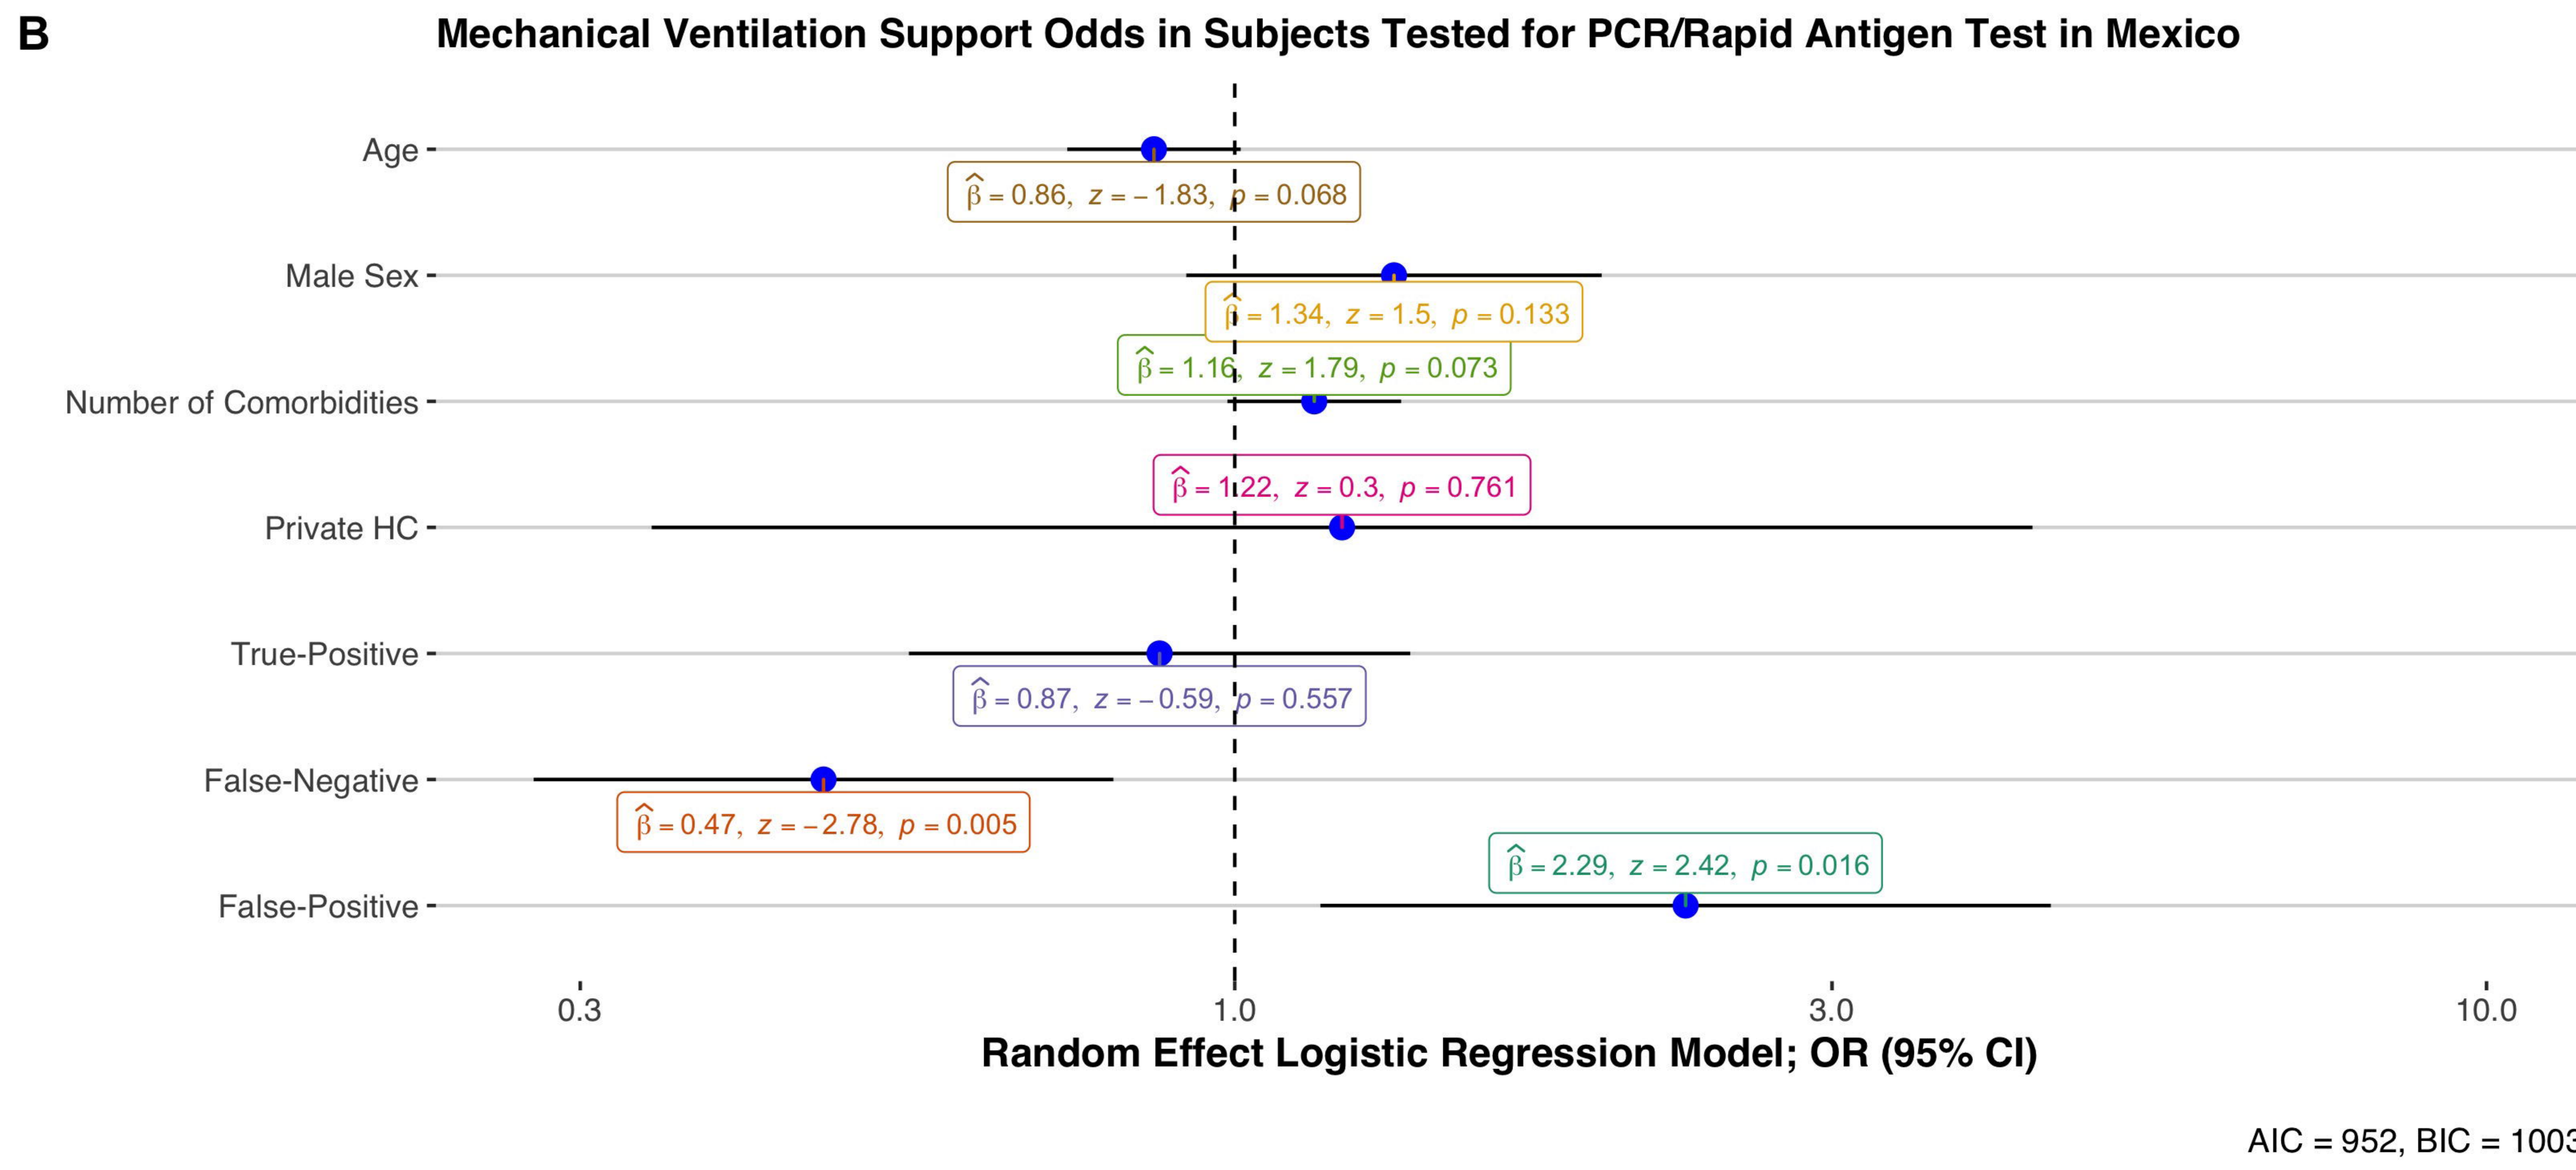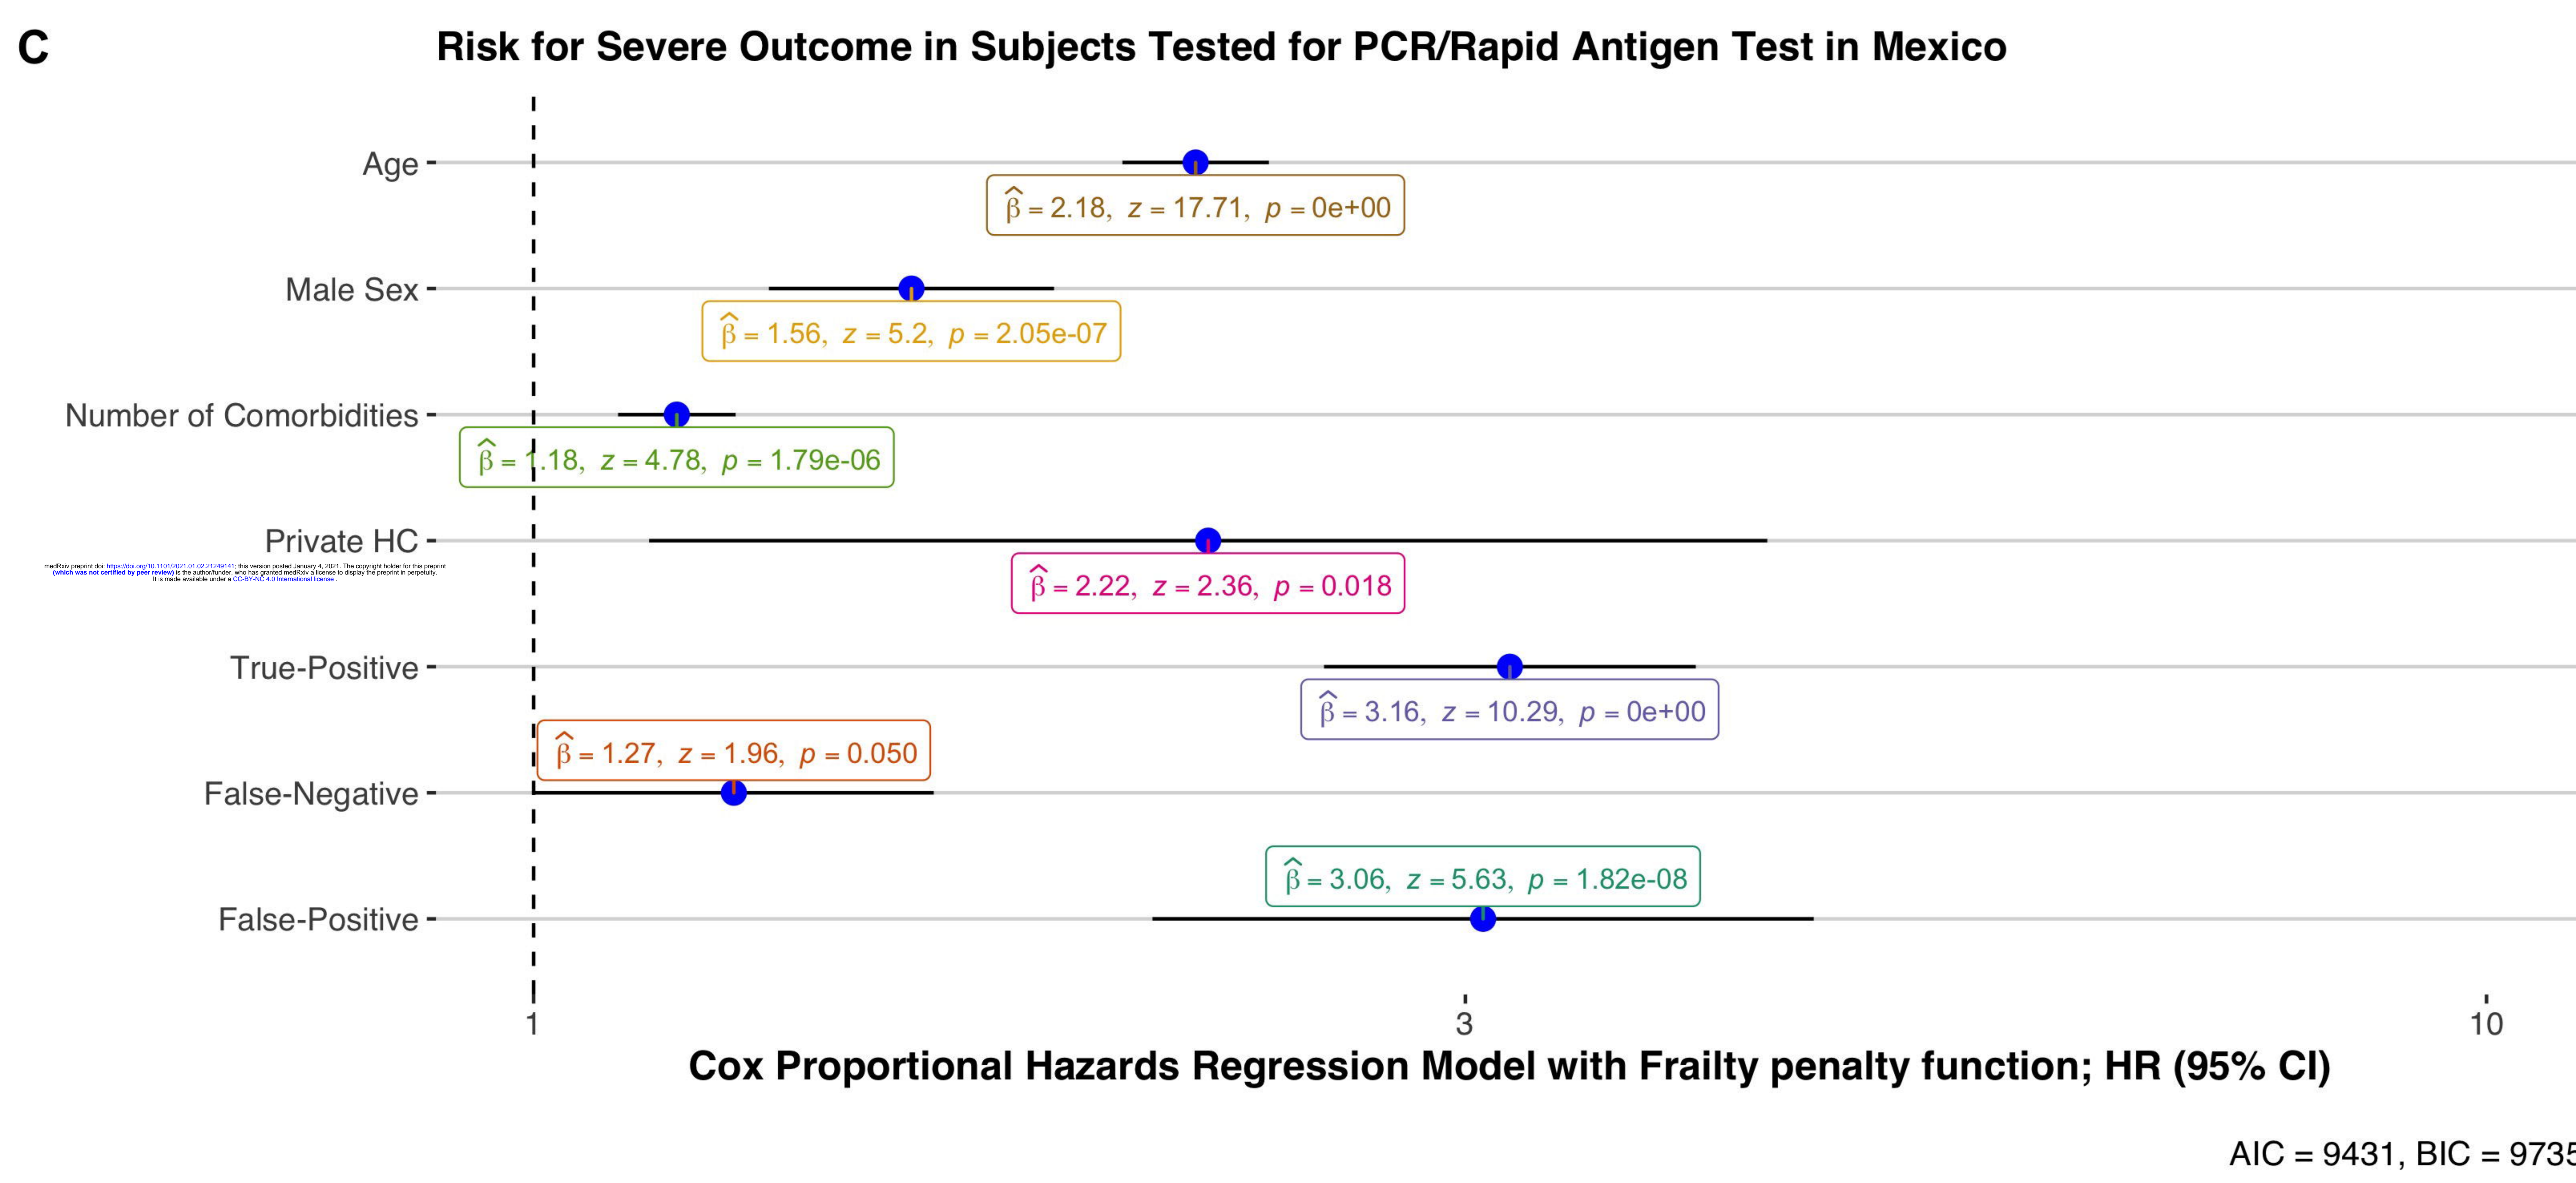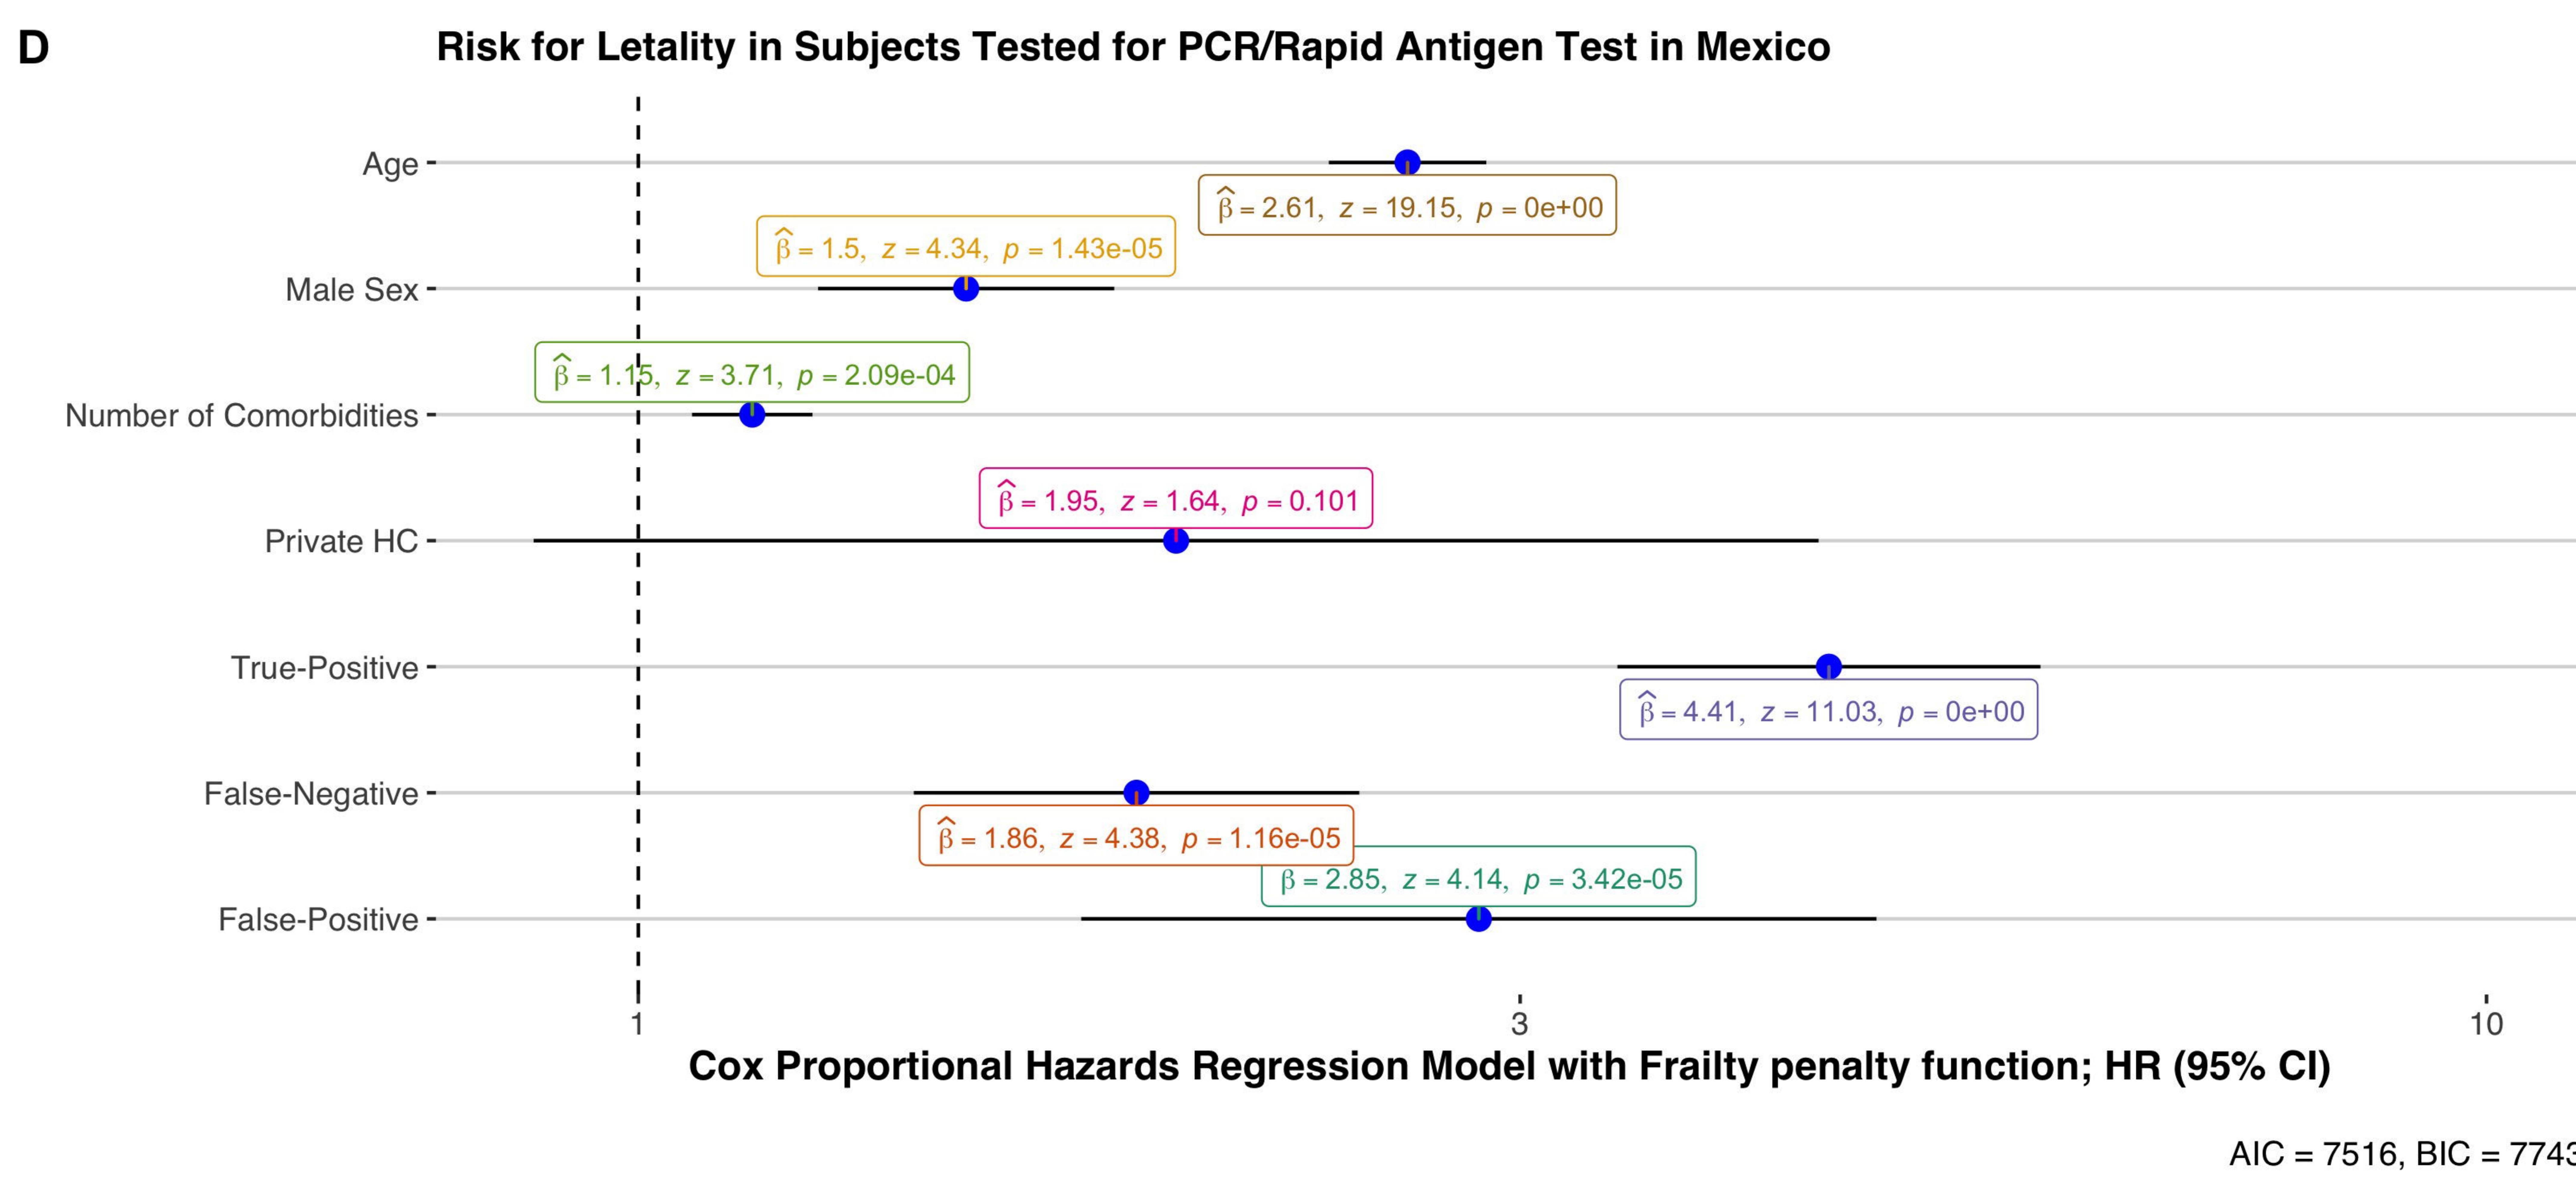

Source: https://www.medrxiv.org/content/10.1101/2021.01.02.21249141v1.full.pdf
